1 **A hyper-immunogenic and slow-growing fungal strain induces a murine**  
2 **granulomatous response to cryptococcal infection**

3

4 Running title: A murine cryptococcal granuloma model

5

6 Calla L. Telzrow,<sup>a,b</sup> Shannon Esher Righi,<sup>c</sup> Natalia Castro-Lopez,<sup>d,e#</sup> Althea

7 Campuzano,<sup>d</sup> Jacob T. Brooks,<sup>f</sup> John M. Carney,<sup>a,g</sup> Floyd L. Wormley Jr.,<sup>d,e#</sup> J. Andrew

8 Alspaugh<sup>a,b\*</sup>

9

10 <sup>a</sup>Department of Medicine, Duke University School of Medicine, Durham, NC

11 <sup>b</sup>Department of Molecular Genetics and Microbiology, Duke University School of

12 Medicine, Durham, NC

13 <sup>c</sup>Department of Microbiology and Immunology, Tulane University School of Medicine,

14 New Orleans, LA

15 <sup>d</sup>Department of Biology, University of Texas at San Antonio, San Antonio, TX

16 <sup>e</sup>Department of Biology, Texas Christian University, Fort Worth, TX

17 <sup>f</sup>Department of Physics and Astronomy, University of North Carolina at Chapel Hill,

18 Chapel Hill, NC

19 <sup>g</sup>Department of Pathology, Duke University School of Medicine, Durham, NC

20

21 <sup>#</sup>Current address: Department of Biology, Texas Christian University, Fort Worth, TX

22

23

24 \*Corresponding author:

25 J. Andrew Alspaugh

26 337 Sands Research Building

27 303 Research Drive, DUMC 102359

28 Durham, NC 27710, USA

29 Tel: (919) 684-0045

30 Fax: (919) 684-8902

31 [andrew.alspaugh@duke.edu](mailto:andrew.alspaugh@duke.edu)

32

33 Keywords: *Cryptococcus neoformans*, granuloma, GM-CSF, cell wall, Titan cell, cell

34 cycle defects, hypoxia

35 **ABSTRACT**

36 Many successful pathogens cause latent infections, remaining dormant within the  
37 host for years but retaining the ability to reactivate to cause symptomatic disease. The  
38 human opportunistic pathogen *Cryptococcus neoformans* is a ubiquitous yeast that  
39 establishes latent pulmonary infections in immunocompetent individuals upon fungal  
40 inhalation from the environment. These latent infections are frequently characterized by  
41 granulomas, or foci of chronic inflammation, that contain dormant cryptococcal cells.  
42 Immunosuppression causes these granulomas to break down and release viable fungal  
43 cells that proliferate, disseminate, and eventually cause lethal cryptococcosis. This  
44 course of *C. neoformans* dormancy and reactivation is understudied due to limited  
45 models, as chronic pulmonary granulomas do not typically form in most mouse models  
46 of cryptococcal infection. Here, we report that a previously characterized *Cryptococcus*-  
47 specific gene which is required for host-induced cell wall remodeling, *MAR1*, inhibits  
48 murine granuloma formation. Specifically, the *mar1* $\Delta$  loss-of-function mutant strain  
49 induces mature pulmonary granulomas at sites of infection dormancy in mice. Our data  
50 suggest that the combination of reduced fungal burden and increased immunogenicity  
51 of the *mar1* $\Delta$  mutant strain stimulates a host immune response that contains viable  
52 fungi within granulomas. Furthermore, we find that the *mar1* $\Delta$  mutant strain has slow  
53 growth and hypoxia resistance phenotypes, which may enable fungal persistence within  
54 pulmonary granulomas. Together with the conventional primary murine infection model,  
55 latent murine infection models will advance our understanding of cryptococcal disease  
56 progression and define fungal features important for persistence in the human host.

57

## 58 INTRODUCTION

59 Granulomas are complex foci of chronic inflammation that form in response to  
60 many stimuli, including microbial infections. A hallmark of indolent infections such as  
61 tuberculosis disease, granulomas are often characterized by epithelioid macrophages,  
62 multinucleated giant cells, and dormant and/or slowly proliferating microorganisms (1–  
63 4). The traditional understanding of the granuloma considered it to be a host-directed  
64 defense response that restricts microbial access to nutrients and oxygen, resulting in an  
65 immune microenvironment that limits microbial proliferation and prevents dissemination  
66 (3, 4). However, more recent work has demonstrated that granulomas are a dynamic  
67 component of the complex host-microbial “arms race”. In addition to serving as a host-  
68 directed protection mechanism, microorganisms can exploit the granuloma as a micro-  
69 niche for long-term survival in the host, where they remain shielded from immune  
70 detection until microbial reactivation (3–5). Although most work on granulomas has  
71 been conducted in the context of mycobacterial infections, many other infectious  
72 microorganisms induce granuloma formation in the human lung (6).

73 The fungal pathogen *Cryptococcus neoformans* is a significant cause of  
74 pneumonia and fatal meningoencephalitis in immunocompromised populations around  
75 the world, resulting in more than 180,000 deaths annually (7). Primary infection occurs  
76 upon inhalation of environmental *C. neoformans* cells and/or spores, often early in life  
77 (4, 8). Immunocompetent hosts typically control the primary infection, with fungi  
78 remaining dormant but viable within lung-associated granulomas (9). As a result,  
79 immunocompetent hosts do not manifest infection-related symptoms with disease  
80 during this stage of latency (10). However, this latent infection can reactivate when a

81 previously exposed individual becomes immunocompromised, especially in the setting  
82 of CD4+ T cell functional deficiency due to HIV infection, organ transplantation, and  
83 immunosenescence (2, 4, 7, 11). Breakdown of the cryptococcal granuloma structure  
84 results in microbial proliferation and systemic dissemination, including to the central  
85 nervous system.

86         The reactivation of fungal cells from granulomas is an understudied facet of  
87 cryptococcal disease, largely due to limited reactivation models. Although the mouse is  
88 the most well-characterized and commonly used animal model to study *Cryptococcus*-  
89 host interactions, many murine models do not form sustained granulomas in response  
90 to clinically relevant isolates of *C. neoformans* (12). As a result, most murine  
91 experiments focus on primary cryptococcal infection and subsequent systemic  
92 dissemination. To explore cryptococcal latency and reactivation, investigators have  
93 adopted models of cryptococcosis in rabbits (13) and rats (14, 15) or employed less  
94 virulent *C. neoformans* strains in mice (12, 16, 17). Recently, a novel latent model was  
95 reported in which pulmonary granulomas form in mice in response to infection with the  
96 *gcs1Δ* mutant cryptococcal strain lacking the glucosylceramide synthase (18–21).  
97 Mimicking the typical course of human disease, *gcs1Δ* cells induce well-formed  
98 granulomas in the lungs which contain dormant *gcs1Δ* cells that become reactivated  
99 from granulomas and disseminate upon immunosuppression (22).

100         We recently reported the identification and characterization of the *C. neoformans*  
101 *MAR1* gene that is required for cell surface remodeling in response to the host  
102 environment (23). The *mar1Δ* loss-of-function mutant strain displays altered cell surface  
103 features when exposed to physiological conditions, including decreased cell wall

104 glucans and mannans, increased exposure of cell wall chitin, and impaired  
105 polysaccharide capsule attachment (23). The cell surface alterations of the *mar1*Δ  
106 mutant strain result in enhanced macrophage activation *in vitro* and hypovirulence in a  
107 murine inhalation model of cryptococcosis (23). We report here that this hyper-  
108 immunogenic *mar1*Δ mutant strain induces pulmonary granulomas in mice, resulting in  
109 a chronic and indolent infection. Furthermore, we describe both fungal and host factors  
110 that contribute to this granuloma response. From the fungal perspective, the  
111 combination of reduced fungal burden and hyper-immunogenicity of the *mar1*Δ mutant  
112 strain stimulates a host immune response that contains *mar1*Δ mutant cells within well-  
113 circumscribed granulomas. From the host perspective, we find that host GM-CSF  
114 signaling, a known contributor to granuloma formation (17, 24–26), is required for the  
115 formation of these granulomas. Finally, *in vitro* studies demonstrate that the *mar1*Δ  
116 mutant strain has cell cycle defects that may contribute to a slow growth phenotype and  
117 hypoxia resistance, two features which likely enable cryptococcal persistence within  
118 pulmonary granulomas. Because *MAR1* is a *Cryptococcus*-specific gene, this model  
119 represents a unique addition to the limited tools available to study the reactivation  
120 model of cryptococcal disease.

121

## 122 **MATERIALS & METHODS**

### 123 **Strains, media, and growth conditions**

124 All strains used in this study were generated in the *C. neoformans* var. *grubii* H99  
125 (*MAT*α) (13) background and are included in Table 1. Strains were maintained on yeast  
126 extract-peptone-dextrose (YPD) medium (1% yeast extract, 2% peptone, 2% dextrose,

127 and 2% agar for solid medium). Unless otherwise indicated, strains were incubated at  
128 30°C.

### 129 **Histology analyses**

130 The murine inhalation model of cryptococcosis was exclusively used in this study  
131 (27). For initial histological examination, C57BL/6 female mice were acquired from  
132 Charles River Laboratories. Mice were anesthetized with 2% isoflurane utilizing a rodent  
133 anesthesia device (Eagle Eye Anesthesia, Jacksonville, FL) and were infected via the  
134 intranasal route with  $1 \times 10^4$  CFU of either the wild-type (WT) (H99) or the *mar1* $\Delta$   
135 mutant (MAK1) strain. Mice were sacrificed at predetermined endpoints (3, 7, 14, and  
136 40 DPI) by CO<sub>2</sub> inhalation followed by an approved secondary method of euthanasia.  
137 Lungs were perfused with and stored in 10% neutral buffered formalin. Lungs were  
138 subsequently paraffin-embedded, sectioned, mounted, and stained with hematoxylin  
139 and eosin by the Duke University School of Medicine Research Immunohistochemistry  
140 Shared Resource.

141 To determine the role of GM-CSF signaling in granuloma formation in this model,  
142 lungs from male and female *Csf2rb*<sup>-/-</sup> mice (The Jackson Laboratory # 005940) were  
143 prepared as described above, with a few alterations. Mice were sacrificed at the  
144 predetermined endpoints of 3, 7, and 14 DPI by CO<sub>2</sub> inhalation followed by an approved  
145 secondary method of euthanasia and lungs were perfused with PBS. The right lung was  
146 stored in 10% neutral buffered formalin for future histopathology preparation, while the  
147 left lung was used for fungal burden quantification analyses, as described below.

### 148 **Fungal burden quantification**

149 Mice were infected as described above. Mice were euthanized at predetermined  
150 endpoints by CO<sub>2</sub> inhalation followed by cervical dislocation, and lung tissues and/or  
151 brain tissues were excised. The left lobe of the lung and/or the brain was removed and  
152 homogenized in 1 mL of sterile PBS as previously described (28) followed by culture of  
153 10-fold dilutions of each homogenate on YPD agar medium supplemented with  
154 chloramphenicol. Colony-forming units (CFU) were enumerated following incubation at  
155 30°C for 48 hours. Statistical significance was determined using Student's *t* test  
156 (GraphPad Software, San Diego, CA).

### 157 **Pulmonary cytokine analyses**

158 C57BL/6 female mice acquired from Charles River Laboratories were infected  
159 and sacrificed as described above. Cytokine levels within the lung homogenates of  
160 infected mice were analyzed using the Bio-Plex protein array system (Luminex-based  
161 technology, Bio-Rad Laboratories, Hercules, CA). Briefly, lung tissues were excised and  
162 homogenized in 1 mL ice-cold sterile PBS. An aliquot (50 µl) was taken to quantify the  
163 pulmonary fungal burden, and an anti-protease buffer solution (1 mL) containing PBS,  
164 protease inhibitors, and 0.05% Triton X-100 was added to the homogenate. Samples  
165 were then clarified by centrifugation (3,500 rpm) for 10 minutes. Supernatants from  
166 pulmonary homogenates were assayed for the presence of IL-1α, IL-1β, IL-2, IL-3, IL-4,  
167 IL-5, IL-6, IL-9, IL-10, IL-12 (p40), IL-12 (p70), IL-13, IL-17, KC (CXCL1), MCP-1  
168 (CCL2), MIP-1α (CCL3), MIP-1β (CCL4), RANTES (CCL5), Eotaxin (CCL11), IFN-γ,  
169 tumor necrosis factor (TNF)-α, granulocyte macrophage-colony stimulating factor (GM-  
170 CSF), and granulocyte-colony stimulating factor (G-CSF) according to the



171 manufacturer's instructions. Statistical significance between strains at each timepoint  
172 was determined using Student's *t* test (GraphPad Software, San Diego, CA).

### 173 **Pulmonary leukocyte isolation**

174 C57BL/6 female mice acquired from Charles River Laboratories were infected  
175 and sacrificed as described above. Lungs of infected mice were excised on 1, 3, 7, 14,  
176 and 21 DPI as previously described (28). Lungs were then digested enzymatically at  
177 37°C for 30 minutes in 10 mL digestion buffer (RPMI 1640 and 1 mg/mL collagenase  
178 type IV [Sigma-Aldrich, St. Louis, MO]) with intermittent (every 10 minutes) stomacher  
179 homogenizations. The digested tissues were then successively filtered through sterile  
180 70- and 40- $\mu$ m nylon filters (BD Biosciences, San Diego, CA) to enrich for leukocytes,  
181 and the cells were then washed three times with sterile Hank's Balanced Salt Solution  
182 (HBSS). Erythrocytes were lysed by incubation in  $\text{NH}_4\text{Cl}$  buffer (0.859%  $\text{NH}_4\text{Cl}$ , 0.1%  
183  $\text{KHCO}_3$ , 0.0372%  $\text{Na}_2\text{EDTA}$  [pH 7.4]; Sigma-Aldrich) for 3 minutes on ice followed by a  
184 2-fold excess of sterile PBS.

### 185 **Flow cytometry analyses**

186 Pulmonary leukocytes were isolated from infected mice as described above.  
187 Standard methodology was employed for the direct immunofluorescence of pulmonary  
188 leukocytes (28, 29). Briefly, in 96-well U-bottom plates, 100  $\mu$ l containing  $1 \times 10^6$  cells in  
189 PBS were incubated with yellow Zombie viability dye (1:1000 dilution, Cat. No 423104,  
190 Biolegend, San Diego, CA) for 15 minutes at room temperature followed by washing in  
191 FACS buffer. Cells were then incubated with Fc block (1:500 dilution, Cat. # 553142,  
192 clone 2.4G2, BD Biosciences) diluted in FACS buffer for 5 minutes to block nonspecific  
193 binding of antibodies to cellular Fc receptors. Cells were then incubated with

194 fluorochrome-conjugated antibodies in various combinations to allow for multi-staining  
195 for 30 minutes at 4°C. Cells were washed three times with FACS buffer and fixed in  
196 200 µl of 2% ultrapure formaldehyde (Polysciences, Warrington, PA) diluted in FACS  
197 buffer (fixation buffer). Fluorescence minus one (FMO) controls or cells incubated with  
198 either FACS buffer alone, or single fluorochrome-conjugated antibodies were used to  
199 determine positive staining and spillover/compensation calculations, and background  
200 fluorescence was determined with FlowJo v.10.8 Software (FlowJo, LLC, Ashland, OR).  
201 Raw data were collected with a Cell Analyzer LSRII (BD Biosciences) using BD  
202 FACSDiva v8.0 software at the University of North Texas Health Sciences Center  
203 (UNTHSC) Flow Core, and compensation and data analyses were performed using  
204 FlowJo v.10.8 Software. Cells were first gated for lymphocytes (SSC-A vs. FSC-A) and  
205 singlets (FSC-H vs. FSC-A). The singlets gate was further analyzed for the uptake of  
206 live/dead yellow stain to determine live vs. dead cells. From live cells, cells were gated  
207 on CD45+ cell expression. For data analyses, 100,000 events (cells) were evaluated  
208 from a predominantly leukocyte population identified by back gating from CD45+ stained  
209 cells. Statistical significance between strains at each timepoint was determined using  
210 Student's *t* test (GraphPad Software, San Diego, CA).

### 211 **Macrophage activation analyses**

212 Intracellular staining of markers of macrophage activation was performed as  
213 described previously (29). Leukocytes isolated from infected mice as described above  
214 were incubated with cell stimulation cocktail (eBioscience Cat. # 00-4970-03) according  
215 to the manufacturer's recommendation and incubated at 37°C in 5% CO<sub>2</sub> in cRPMI for  
216 two hours in a six-well plate. Golgi plug (1:100 dilution, Brefeldin A, Cat. # 51-2301KZ,

217 BD Biosciences) was added according to the manufacturer's recommendations and  
218 incubated for an additional four hours (6 hours total). Cells were washed with PBS and  
219 stained with yellow Zombie viability dye in PBS at room temperature in the dark for  
220 15 minutes. Cells were then washed with FACS buffer and incubated with Fc block (BD  
221 Biosciences) diluted in FACS buffer for 5 minutes. For nitric oxide (iNOS) and Arginase  
222 1 (Arg1) production in macrophages, cells were stained for surface markers CD45,  
223 CD11b, CD64, F4/80, and CD24, and incubated at 4°C for 30 minutes. Cells were then  
224 washed and fixed with 2% ultra-pure formaldehyde (Polysciences, Warrington, PA) for  
225 20 minutes. Subsequently, cells were washed with 0.1% saponin buffer and stained with  
226 antibodies for iNOS and Arg1 for 30 minutes at 4°C. Finally, cells were washed with  
227 saponin buffer and fixed with 2% ultra-pure formaldehyde. Samples were processed  
228 using a Cell Analyzer LSRII (BD Biosciences) using BD FACSDiva v8.0 software at the  
229 UNTHSC Flow Core, and 100,000 events were collected for analysis using FlowJo  
230 v.10.8 Software. Statistical significance between strains at each timepoint was  
231 determined using Student's *t* test (GraphPad Software, San Diego, CA).

### 232 **Titan cell assay and quantification**

233 A previously described *in vitro* titanization assay was used here (30). In brief, the  
234 WT (H99), the *mar1*Δ mutant (MAK1), and the *mar1*Δ + *MAR1* (MAK11) strains were  
235 incubated for 18 hours at 30°C, 150 rpm in 5 mL yeast nitrogen base (YNB) without  
236 amino acids prepared according to the manufacturer's instructions plus 2% glucose.  
237 Cultures were washed six times with PBS. An optical density at 600 nm (OD<sub>600</sub>) of 0.001  
238 for each strain was transferred to 5 mL 10% heat-inactivated fetal bovine serum (HI-  
239 FBS) in PBS and incubated at 37°C, 5% CO<sub>2</sub> for 96 hours. Cells were imaged by

240 differential interference contrast (DIC) microscopy using a Zeiss Axio Imager A1  
241 microscope equipped with an Axio-Cam MRm digital camera. Cell diameter was  
242 measured using the ImageJ software (FIJI), and cells with a diameter > 10  $\mu\text{m}$  were  
243 considered Titan cells. A minimum of 400 cells were analyzed across three biological  
244 replicates for each fungal strain. Statistical significance was determined using one-way  
245 analysis of variance (ANOVA) and the Tukey-Kramer test (GraphPad Software, San  
246 Diego, CA).

#### 247 **SEM polysaccharide capsule visualization**

248 The WT (H99), the *mar1* $\Delta$  mutant (MAK1), the *mar1* $\Delta$  + *MAR1* (MAK11), and the  
249 *cap59* $\Delta$  mutant (*cap59*) strains were incubated in YPD medium at 30°C and CO<sub>2</sub>-  
250 independent medium (Gibco) at 37°C until saturation. Samples were fixed with 2.5%  
251 glutaraldehyde for 1 hour at room temperature and were subsequently washed 3 times  
252 with PBS. Each sample was mounted onto 12 mm poly-L-lysine-coated coverslips  
253 (Neuvitro Corporation) and subsequently dehydrated by immersing the coverslips in  
254 ethanol (30% for 5 minutes, 50% for 5 minutes, 70% for 5 minutes, 95% for 10 minutes,  
255 100% for 10 minutes, and 100% for 10 minutes). Samples were then critical point dried  
256 with a Tousimis 931 critical point dryer (Rockville, Maryland) and coated with gold-  
257 palladium using a Cressington 108 sputter-coater (Watford, United Kingdom).  
258 Coverslips containing the prepared samples were mounted and imaged on a Hitachi S-  
259 4700 scanning electron microscope (Tokyo, Japan).

#### 260 **Cellular morphology defect quantification**

261 The WT (H99), the *mar1* $\Delta$  mutant (MAK1), and the *mar1* $\Delta$  + *MAR1* (MAK11)  
262 strains were incubated for 18 hours in YPD medium at 30°C with shaking at 150 rpm. An

263 OD<sub>600</sub> of approximately 0.2 for each strain was transferred to fresh YPD medium and  
264 subsequently incubated at either 30°C or 37°C for 18 hours with shaking at 150 rpm.  
265 Cells were then pelleted, washed with PBS, and imaged by differential interference  
266 contrast (DIC) microscopy. DIC images were captured using a Zeiss Axio Imager A1  
267 microscope equipped with an Axio-Cam MRm digital camera. A minimum of 500 cells  
268 were analyzed across three biological replicates for each strain using the ImageJ  
269 software (FIJI). Statistical significance was determined using two-way analysis of  
270 variance (ANOVA) and the Tukey-Kramer test (GraphPad Software, San Diego, CA).

### 271 **Growth curve analysis**

272 The WT (H99), the *mar1*Δ mutant (MAK1), and the *mar1*Δ + *MAR1* (MAK11)  
273 strains were incubated for 18 hours in YPD medium at 30°C with 150 rpm shaking.  
274 Cultures were normalized to an OD<sub>600</sub> of 0.01 in fresh YPD medium and added to wells  
275 of a 96-well plate. Growth was then measured at an absorbance of 595 nm every 10  
276 minutes for 40 hours with shaking between readings and incubation at 37°C. Control  
277 wells containing YPD medium alone were also included to eliminate any background  
278 absorbance.

### 279 **Hypoxia resistance analyses**

280 The WT (H99), the *mar1*Δ mutant (MAK1), the *mar1*Δ + *MAR1* (MAK11), and the  
281 *sre1*Δ mutant (HEB6) strains were incubated in YPD medium at 30°C until mid-  
282 logarithmic growth phase. Strains were washed once in PBS, normalized to an OD<sub>600</sub> of  
283 0.6 in PBS, and serially diluted onto YES (0.5% [w/v] yeast extract, 2% glucose, and  
284 225 μg/mL uracil, adenine, leucine, histidine, and lysine) medium agar plates with or  
285 without cobalt chloride (0.7 mM) (31). Microaerophilic conditions were generated using

286 a sealed chamber (BD GasPak™) and two activated GasPak™ EZ Campy Container  
287 System sachets (31). Plates were placed in the chamber (microaerophilic) or outside  
288 the chamber (ambient air), incubated at 30°C, and imaged daily for 96 hours.

### 289 **Mouse isolate recovery and phenotypic characterization**

290 C57BL/6 female mice acquired from Charles River Laboratories were infected as  
291 described above. At 61 DPI and 100 DPI, mice were sacrificed by CO<sub>2</sub> inhalation  
292 followed by an approved secondary method of euthanasia and fungi were subsequently  
293 isolated from the lungs as described above. Single fungal colonies were plated onto  
294 YPD agar medium and subsequently frozen in separate wells of 96-well plates at -80°C.  
295 Isolated fungi were stamped onto YPD agar medium incubated at 30°C, YPD agar  
296 medium incubated at 37°C, YPD agar medium supplemented with nourseothricin (NAT)  
297 (100 µg/mL) incubated at 30°C, and YPD agar medium buffered (150 mM HEPES) to  
298 pH 8.15 incubated at 30°C. All plates were imaged daily. Mouse isolates were  
299 determined to be *mar1Δ* mutant strain isolates based on growth on YPD + NAT medium  
300 and dry colony morphology on YPD pH 8.15 medium (23). The original WT (H99) and  
301 *mar1Δ* mutant (MAK1) strains were included on each plate as controls.

### 302 **Ethical use of animals**

303 All animal experiments in this manuscript were approved by the University of  
304 Texas at San Antonio Institutional Animal Care and Use Committee (IACUC) (protocol  
305 #MU021), the Texas Christian University and the University of North Texas Health  
306 Sciences Center (UNTHSC) IACUC (protocol #1920-9), and the Duke University IACUC  
307 (protocol #A102-20-05). Mice were handled according to IACUC guidelines.

### 308 **Data availability**

309 All fungal strains and reagents are available upon request.

310

## 311 RESULTS

312 **Pulmonary granulomas are formed and maintained in mice infected with the**  
313 ***mar1*Δ mutant strain.**

314 Based on our recent observations that the *mar1*Δ mutant strain displays a highly  
315 immunogenic cell surface, we hypothesized that the *mar1*Δ mutant strain would have  
316 unique interactions with the host *in vivo*. We previously observed that the *mar1*Δ mutant  
317 strain is hypovirulent compared to the wild-type (WT) strain in a murine inhalation model  
318 of cryptococcosis (23). Highly immunogenic fungal strains often induce a  
319 hyperinflammatory response that is detrimental to the host, resulting in hypervirulence  
320 (32–34). We therefore explored in greater detail the mechanisms by which the highly  
321 immunogenic *mar1*Δ mutant strain simultaneously activates and is controlled by the  
322 host immune response.

323 As an initial investigation into the interactions between the *mar1*Δ mutant strain  
324 and the host, we assessed the gross appearance of infected lungs from our previously  
325 reported *mar1*Δ mutant strain murine inhalation infection experiment. At the time of  
326 sacrifice, generally between 24-40 days post-inoculation (DPI), we observed that the  
327 lungs of *mar1*Δ-infected C57BL/6 mice displayed large, well-circumscribed inflammatory  
328 foci surrounded by healthy-appearing lung tissue (Figure 1A). This contrasts starkly with  
329 WT-infected lungs, which typically exhibit uncontrolled fungal proliferation accompanied  
330 by a diffuse inflammatory response.

331           We examined histopathological features of infected murine lungs at specific  
332 timepoints throughout the course of infection to further characterize the unique  
333 pathology observed in *mar1Δ*-infected lungs. To do so, we replicated the experimental  
334 approach used in Figure 1A; we inoculated C57BL/6 mice by inhalation with the WT  
335 strain or the *mar1Δ* mutant strain and subsequently harvested lungs for analysis  
336 throughout infection. At 3 DPI, an early timepoint in infection at which all inoculated  
337 mice still appear healthy, the WT-infected and *mar1Δ*-infected lungs appear similar, with  
338 the only notable exception being the increased number of fungal cells observed in the  
339 WT-infected lungs (Figures 1B & S1). By 7 DPI, a timepoint in infection in which WT-  
340 infected mice begin to show signs and symptoms of fungal disease but the *mar1Δ*-  
341 infected mice still appear healthy, WT-infected lungs display numerous small foci of  
342 inflammation (mean diameter = 535 μm) that contain some, but not all, fungal cells  
343 (Figures 1B, 1C, & S1). As described previously, many of the WT fungal cells exhibit  
344 signs of titanization (35). These foci of inflammation also occasionally display hallmarks  
345 of early granuloma formation, such as the presence of epithelioid macrophages (1, 2, 4)  
346 (Figure 1B). This type of immature granulomatous inflammatory response has been  
347 reported previously in the C57BL/6 background infected with the *C. neoformans*  
348 serotype D strain, 52D (17). In contrast, the *mar1Δ*-infected lungs have few visible  
349 fungal cells and display a more uniform pattern of inflammation throughout the lungs at  
350 7 DPI (Figures 1B). These observations demonstrate that distinct characteristics of the  
351 *mar1Δ* mutant strain pathology emerge early in infection.

352           At 14 DPI, a timepoint in infection in which the WT-infected mice begin to  
353 succumb to fungal infection and the *mar1Δ*-infected mice still appear healthy, WT cells,



354 many of which are titanized, proliferate throughout the lungs resulting in a scattered,  
355 unorganized inflammatory response with mixed cell infiltrates (Figure 1B). Additionally,  
356 most nascent granulomas have broken down, which may explain why this timepoint also  
357 corresponds to a period of accelerating clinical symptoms and imminent mortality in WT-  
358 infected mice (Figures 1B & 1C). In contrast, *mar1Δ*-infected lungs begin to form  
359 granulomas by 14 DPI. Specifically, foci of inflammation appear (mean diameter = 866  
360  $\mu\text{m}$ ), containing few fungal cells which are surrounded by regions of normal-appearing  
361 lung tissue without fungal or inflammatory cells (Figures 1B & 1C). Additionally, these  
362 inflammatory foci contain hallmarks of granulomas, such as epithelioid macrophages  
363 surrounded by lymphocytes (1, 2, 4) (Figure 1B). In contrast to those infected with the  
364 WT strain, the *mar1Δ*-infected mice display few infection-related symptoms at this  
365 timepoint.

366 Many *mar1Δ*-infected mice survive to 40 DPI (23). At this late timepoint in  
367 infection, mature granulomas are frequently observed (mean diameter = 1355  $\mu\text{m}$ ),  
368 containing fungal cells, multinucleated giant cells, and palisading epithelioid  
369 macrophages (Figures 1B, 1C, & S1). Additionally, no fungal cells are observed in lung  
370 tissue outside of these granulomas. Collectively, these observations suggest differences  
371 in the immune response in the context of WT and *mar1Δ* mutant strain infection. WT-  
372 infected mice show a consistently robust mixed inflammatory response and variable  
373 Titan cell response with vague granuloma formation during early stages of infection (7  
374 DPI) (Figures 1B, 1C, & S1). This response is ineffective and is quickly overcome by  
375 fungal growth, resulting in fungal proliferation throughout the lungs (14 DPI) (Figures 1B  
376 & 1C). In contrast, the *mar1Δ*-infected mice show an absent to minimal inflammatory

377 response, absent Titan cell formation, and minimal granulomatous inflammatory  
378 response during early stages of infection (7 DPI), with a more well-formed  
379 granulomatous response in mice that survive to later timepoints in infection (40 DPI)  
380 (Figures 1B, 1C, & S1). These *mar1* $\Delta$ -induced granulomas appear sufficient to contain  
381 fungal proliferation.

382

383 **The *mar1* $\Delta$  mutant strain has a reduced fungal burden and hyper-immunogenicity**  
384 ***in vivo*.**

385 To explore possible mechanisms by which *mar1* $\Delta$  mutant strain infections induce  
386 pulmonary granuloma formation, we assessed fungal burden and the pulmonary  
387 immune response at timepoints relevant to granuloma formation. To do so, we  
388 replicated the experimental approaches used in Figure 1; we inoculated C57BL/6 mice  
389 by inhalation and harvested lungs for analysis throughout infection. We previously  
390 reported a decrease in fungal burden in *mar1* $\Delta$ -infected lungs compared to WT-infected  
391 lungs as early as 1 and 4 DPI, despite identical doses being used for both strains (23).  
392 In this work, at all tested timepoints (3, 7, 14, & 21 DPI), we find that *mar1* $\Delta$ -infected  
393 lungs have a significantly reduced fungal burden compared to WT-infected lungs.  
394 Specifically, the *mar1* $\Delta$ -infected lungs have a 10-fold reduction in fungal burden at 3  
395 DPI, a 100-fold reduction in fungal burden at 7 DPI, and a >500-fold reduction in fungal  
396 burden at 14 and 21 DPI compared to WT-infected lungs (Figure 2). These observations  
397 support the reduced number of *mar1* $\Delta$  mutant cells observed at these same timepoints  
398 in our histopathology analyses (Figure 1B). As a result of the drastic reduction in  
399 pulmonary fungal burden throughout infection, we observed that the *mar1* $\Delta$  mutant

400 strain rarely disseminates to the brain (Figure 2). When the *mar1* $\Delta$  mutant strain does  
401 disseminate to the brain, the fungal burden is markedly lower than that of the WT strain  
402 (Figure 2). Together, these observations indicate that the *mar1* $\Delta$  mutant strain has  
403 reduced fungal burden in the murine lung and brain, reinforcing our previous reports  
404 that the *mar1* $\Delta$  mutant strain has reduced fitness in host-relevant conditions.

405         Based on the drastic differences in fungal burden observed between WT-infected  
406 and *mar1* $\Delta$ -infected lungs, we hypothesized that the immune microenvironment within  
407 the lungs would also differ significantly. We replicated the experimental approaches  
408 used in Figure 1; we inoculated C57BL/6 mice by inhalation and harvested lungs for  
409 analysis throughout infection. At early timepoints in infection, 1 and 3 DPI, we observed  
410 similar pulmonary cytokine profiles and leukocyte infiltrates within WT-infected lungs  
411 and *mar1* $\Delta$ -infected lungs (Figures 3A, 3B, S2, & S3). The only significant difference  
412 observed between the two infections was in the production of granulocyte macrophage-  
413 colony stimulating factor (GM-CSF), a cytokine required for maturation of myeloid cells.  
414 Specifically, *mar1* $\Delta$ -infected lungs display a significant increase in GM-CSF production  
415 compared to WT-infected lungs at 3 DPI, an early timepoint in infection at which the  
416 pulmonary immune response is being actively developed (Figures 3A & S2). Despite the  
417 drastic reduction in *mar1* $\Delta$  mutant fungal burden at these early timepoints, the *mar1* $\Delta$   
418 mutant strain induces a cytokine and cellular response comparable to that of the WT  
419 strain, likely due to the increased immunogenicity of the *mar1* $\Delta$  mutant cells.

420         As infection progressed to 7, 14, and 21 DPI, we observed marked reductions in  
421 multiple cytokines (including IL-1 $\beta$ , IL-4, and GM-CSF) and leukocytes (including  
422 CD45+ cells, alveolar macrophages [AM], and CD4+ T cells) in *mar1* $\Delta$ -infected lungs

423 compared to WT-infected lungs (Figures 3A, 3B, S2, & S3). These observations  
424 demonstrate that by these timepoints in infection, the overall cytokine and cellular  
425 response is reduced in *mar1* $\Delta$ -infected lungs compared to WT-infected lungs, likely due  
426 to the sustained reduction in fungal burden present in the *mar1* $\Delta$ -infected lungs. This is  
427 further supported by our histopathological observations made at the same timepoints  
428 demonstrating more localized regions of inflammation in *mar1* $\Delta$ -infected lungs than in  
429 WT-infected lungs (Figure 1B). We further explored macrophage polarization at these  
430 same timepoints to determine whether the reduction in *mar1* $\Delta$  mutant strain fungal  
431 burden, and the subsequent reduction in the pulmonary immune response, are due to  
432 differences in macrophage activation (36). At each tested timepoint (7, 14, and 21 DPI),  
433 we observed that the *mar1* $\Delta$ -infected lungs have a comparable number of or fewer  
434 classically-activated (M1) and alternatively-activated (M2) alveolar and interstitial  
435 macrophages compared to WT-infected lungs (Figure 3C). These observations  
436 demonstrate that the *mar1* $\Delta$  mutant strain does not induce differential macrophage  
437 polarization that results in a reduction in fungal burden and a more protective immune  
438 response. Collectively, these data suggest that *mar1* $\Delta$ -induced pulmonary granuloma  
439 formation appears to be a largely fungal-driven phenomenon. Despite reductions in  
440 fungal burden, the *mar1* $\Delta$  mutant strain induces a WT strain-like immune response early  
441 in infection that results in fungal containment within granulomas during mid-late stages  
442 of infection. As infection matures and progresses, there is a marked decrease in many  
443 cytokines and leukocytes infiltrating the *mar1* $\Delta$ -infected lung that corresponds with the  
444 sustained reduction in fungal burden.  
445

446 **Host GM-CSF signaling is required for pulmonary granuloma formation.**

447 Granuloma formation is dependent on GM-CSF signaling in the context of both  
448 mycobacterial (24–26) and cryptococcal infections (17). GM-CSF is the only cytokine  
449 that showed significant differential production in our cytokine analyses. Specifically, we  
450 observed that the *mar1*Δ mutant strain induces more pulmonary GM-CSF production  
451 than the WT strain at 3 DPI (Figures 3A & S2). We therefore hypothesized that GM-CSF  
452 signaling would also be required for the formation of pulmonary granulomas in our  
453 model. To test this hypothesis, we assessed the progression of infections with the WT  
454 strain and the *mar1*Δ mutant strain in the *Csf2rb*<sup>-/-</sup> mouse background, which is defective  
455 in GM-CSF signaling due to loss of the functional GM-CSF receptor. We inoculated  
456 *Csf2rb*<sup>-/-</sup> mice using the inhalation route and harvested lungs for analysis throughout  
457 infection. Overall, a similar pattern of inflammation was observed between mice infected  
458 with the WT strain and mice infected with the *mar1*Δ mutant strain. We observed that  
459 putative pulmonary granulomas are absent in *Csf2rb*<sup>-/-</sup> mice infected with either strain at  
460 every tested timepoint (3, 7, and 14 DPI) (Figures 4A & S1). Instead, inflammation  
461 appears unorganized and diffuse throughout the entirety of the lungs infected with either  
462 fungal strain. Contrasting with the C57BL/6 infections, the *Csf2rb*<sup>-/-</sup> infections appear to  
463 be characterized by fewer macrophages, which is expected based on previous work  
464 that demonstrated that GM-CSF is required for macrophage recruitment to the lung  
465 during early cryptococcal infection (17) (Figures 4A & S1). Like the C57BL/6 infections,  
466 however, WT fungal cells are abundant throughout the lung, many with signs of  
467 titanization, while *mar1*Δ mutant fungal cells are infrequently observed (Figures 4A &  
468 S1). Pulmonary fungal burden assessed at 3 DPI confirms that *mar1*Δ-infected lungs

469 have a significantly lower fungal burden, with a 10-fold reduction compared to WT-  
470 infected lungs, similar to what was observed in the C57BL/6 infections (Figure 4B).  
471 These data demonstrate that GM-CSF signaling is required for granuloma formation in  
472 both WT strain and *mar1* $\Delta$  mutant strain infections. However, because loss of GM-CSF  
473 signaling does not rescue the reduction of *mar1* $\Delta$  mutant strain fungal burden during  
474 early stages of infection, these data also suggest that GM-CSF signaling does not  
475 exclusively drive the impaired fitness of *mar1* $\Delta$  mutant cells in the murine lung.

476

477 **The *mar1* $\Delta$  mutant strain is attenuated in the employment of various virulence**  
478 **factors.**

479 In our fungal burden assays, we observed a modest increase in *mar1* $\Delta$  mutant  
480 strain fungal burden as infection progressed from 3 to 21 DPI (Figure 2). Despite this,  
481 we find that *mar1* $\Delta$ -infected mice can remain healthy-appearing and survive to at least  
482 100 DPI. Furthermore, viable *mar1* $\Delta$  mutant cells that retain previously reported *mar1* $\Delta$   
483 mutant phenotypes, including dry colony morphology on alkaline pH and nourseothricin  
484 (NAT) resistance (23), can be recovered from the lung at extended timepoints in  
485 infection (61 and 100 DPI) (Figure S4). These observations indicate that the *mar1* $\Delta$   
486 mutant strain can persist within murine lung granulomas for extended periods of time  
487 without causing any symptoms or signs of disease. Based on this observation, we  
488 sought to understand the mechanism by which the *mar1* $\Delta$  mutant strain can survive and  
489 persist in the mouse lung.

490 In both human and murine infections, a subset of cryptococcal cells form  
491 enlarged Titan cells, an important virulence factor that enables cryptococcal persistence

492 in the lungs (35, 37). Using an established *in vitro* titanization assay (30), we observed  
493 that the *mar1* $\Delta$  mutant strain is unable to form Titan cells (Figure 5A). This observation  
494 supports our histopathology experiments, in which Titan cells were absent in *mar1* $\Delta$ -  
495 infected lungs, collectively demonstrating that Titan cell formation does not explain the  
496 persistence of *mar1* $\Delta$  mutant cells within granulomas.

497 We previously reported that the *mar1* $\Delta$  mutant strain is impaired in the  
498 implementation of the polysaccharide capsule, assessed by India ink staining (23). We  
499 utilized high-resolution scanning electron microscopy (SEM) to more rigorously study  
500 the *mar1* $\Delta$  mutant strain capsule architecture. In permissive growth conditions (YPD  
501 medium, 30°C), the capsule of the *mar1* $\Delta$  mutant strain is nearly indistinguishable from  
502 that of the WT strain, which contrasts starkly with the acapsular *cap59* $\Delta$  mutant strain  
503 (Figure 5B). However, in capsule-inducing conditions (TC medium, 37°C), the *mar1* $\Delta$   
504 mutant strain lacks the degree of capsule fiber elongation observed in the WT strain,  
505 explaining the reduction in India ink exclusion previously reported for the *mar1* $\Delta$  mutant  
506 strain (23) (Figure 5B). The inability of the *mar1* $\Delta$  mutant strain to employ these two  
507 important virulence factors, Titan cells and polysaccharide capsule, likely drive the  
508 hyper-immunogenicity observed in our murine infection studies.

509

510 **The *mar1* $\Delta$  mutant strain displays cell cycle defects that result in a slow growth**  
511 **phenotype and hypoxia resistance.**

512 Both Titan cell formation (30, 38) and polysaccharide capsule elaboration (39–  
513 41) are known to be mediated by the cell cycle, suggesting that the *mar1* $\Delta$  mutant strain  
514 may be unable to properly employ these virulence factors due to defects in cell cycle

515 progression. To explore cell cycle progression in the *mar1* $\Delta$  mutant strain background,  
516 we observed *mar1* $\Delta$  mutant cell morphology during logarithmic growth phase. When  
517 incubated at the permissive temperature of 30°C, the *mar1* $\Delta$  mutant strain displays an  
518 increased incidence of cytokinesis defects (such as elongated cells, cells with wide bud  
519 necks, and cells that fail to complete cytokinesis), compared to both the WT strain and  
520 the *mar1* $\Delta$  + *MAR1* complemented strain (Figure 6A). The frequency of these  
521 cytokinesis defects is significantly enhanced at the physiological temperature of 37°C  
522 (Figure 6A). We next determined the impact of these defects on the growth kinetics of  
523 the *mar1* $\Delta$  mutant strain. We observed that the *mar1* $\Delta$  mutant strain displays a  
524 reduction in growth during logarithmic phase at 37°C, compared to both the WT strain  
525 and the *mar1* $\Delta$  + *MAR1* complemented strain (Figure 6B). These data demonstrate that  
526 the *mar1* $\Delta$  mutant strain has a slow growth phenotype at the physiological temperature  
527 of 37°C that is likely driven in part by cytokinesis defects.

528 Cell cycle regulation is also known to be related to fungal adaptation to hypoxia  
529 (42–44). Because *C. neoformans* is an obligate aerobe, WT fungal cells undergo G<sub>2</sub>-  
530 arrest in response to hypoxia (45, 46). We assessed the ability of the *mar1* $\Delta$  mutant  
531 strain to grow in an environment with reduced oxygen availability by observing growth in  
532 the presence of CoCl<sub>2</sub> and in a microaerophilic chamber. In both cases, we observed  
533 that the *mar1* $\Delta$  mutant strain displays enhanced growth compared to the WT strain and  
534 the *mar1* $\Delta$  + *MAR1* complemented strain (Figure 6C). In these assays, the CoCl<sub>2</sub>- and  
535 hypoxia-sensitive *sre1* $\Delta$  mutant strain was used as a control (31) (Figure 6C).  
536 Collectively, these observations suggest that the cell cycle defects of the *mar1* $\Delta$  mutant



537 strain may contribute to its ability to survive, slowly proliferate, and persist in the murine  
538 granuloma environment.

539

## 540 **DISCUSSION**

541 Here, we report and characterize the host response to a chronic and indolent *C.*  
542 *neoformans* lung infection, one distinguished by sustained granulomas. Using the  
543 inhalation route of infection in C57BL/6 mice, we observe granuloma formation in  
544 infections due to both the WT and *mar1* $\Delta$  mutant strains. However, the appearance,  
545 development, and maintenance of these granulomas differ significantly. In WT  
546 infections, small, immature granulomas form early in infection. As infection progresses,  
547 these nascent granulomas begin to degenerate, leading to fungal proliferation  
548 throughout the lungs, fungal dissemination to the brain, and eventually murine death.  
549 This type of early, immature granuloma formation has been observed previously in  
550 murine infections with other *C. neoformans* WT strains (16, 17). In contrast, in *mar1* $\Delta$   
551 mutant strain infections we observe mature pulmonary granulomas that develop over  
552 several weeks in the absence of overt clinical symptoms. These granulomas differ from  
553 the WT-induced granulomas because they appear later in infection, are typically larger,  
554 and are more contained. The containment of these granulomas may be expected  
555 because *mar1* $\Delta$ -induced granulomas are associated with a significantly lower fungal  
556 burden compared to WT strain infections, suggesting that the granulomas effectively  
557 inhibit fungal proliferation throughout the lungs. Despite this drastic reduction in fungal  
558 burden, the *mar1* $\Delta$  mutant strain induces a comparable pulmonary cytokine and  
559 leukocyte response to that of the WT strain during early stages of infection. Previous

560 work reported by our group characterized the *mar1* $\Delta$  mutant strain as more  
561 immunogenic than the WT strain, due to its poorly organized cell wall and impaired  
562 polysaccharide capsule attachment (23). We posit that the combination of reduced  
563 fungal burden and increased immunogenicity drives *mar1* $\Delta$ -induced granuloma  
564 formation: the increased immunogenicity results in an immune response that contains  
565 the reduced number of *mar1* $\Delta$  mutant cells within granulomas during early stages in  
566 infection.

567         We further observe that *mar1* $\Delta$ -induced granulomas are maintained throughout  
568 infection, from 14 DPI to as late as 100 DPI. We find that the immune microenvironment  
569 associated with these granulomas has significantly reduced cytokine and leukocyte  
570 responses. Previous work has implicated classically-activated macrophage polarization  
571 in enhanced antifungal activity of macrophages (47–49). We find that *mar1* $\Delta$ -infected  
572 lungs have a comparable number of or fewer (depending on the timepoint) classically-  
573 activated (M1) and alternatively-activated (M2) macrophages compared to WT-infected  
574 lungs, suggesting that differential polarization of macrophages does not contribute to  
575 the reduced fungal burden and associated immune response in *mar1* $\Delta$ -infected lungs.  
576 Collectively, these observations demonstrate that *mar1* $\Delta$ -induced granulomas are  
577 largely a fungal-driven phenomenon, with the sustained reduction in *mar1* $\Delta$  mutant  
578 strain fungal burden resulting in a dampened immune response compared with WT-  
579 infected lungs. Using these approaches, we have defined a detailed timeline of  
580 granuloma formation, in both WT and *mar1* $\Delta$  mutant strain infections, and characterized  
581 multiple fungal factors that contribute to granuloma formation (Figure S5).

582           In addition to the fungal drivers of *mar1* $\Delta$ -induced granuloma formation described  
583 above, we have also confirmed the role of GM-CSF as a host driver of cryptococcal  
584 granuloma formation. From our pulmonary cytokine analyses, we observed that GM-  
585 CSF is the only differentially produced cytokine in *mar1* $\Delta$ -infected lungs compared to  
586 | WT-infected lungs. Specifically, GM-CSF is elevated in *mar1* $\Delta$ -infected lungs at 3 DPI,  
587 | an early timepoint in infection at which the pulmonary immune response is being  
588 actively developed. This increased GM-CSF production may be a result of increased  
589 Dectin-1 activation by the *mar1* $\Delta$  mutant strain. We previously reported that the *mar1* $\Delta$   
590 mutant strain is partially recognized by the pathogen recognition receptor Dectin-1,  
591 likely due its increased exposed surface  $\beta$ -glucan and chitin (23). Dectin-1 has been  
592 shown to be required for normal GM-CSF production in murine macrophages (50).  
593 Additionally, GM-CSF production is known to result in an increase in Dectin-1  
594 expression by murine macrophages (50, 51). We also report that granuloma formation  
595 is dependent on GM-CSF signaling, as granulomas are absent in *Csf2rb*<sup>-/-</sup> mouse  
596 background infections with either the WT or *mar1* $\Delta$  mutant strains. These results are  
597 expected because GM-CSF plays a significant role in both *C. gattii* and *C. neoformans*  
598 infections, as individuals with GM-CSF autoantibodies are unusually susceptible to  
599 cryptococcal infection (52–54). Furthermore, previous work in both mycobacterial (24–  
600 26) and cryptococcal infections (17) has demonstrated that GM-CSF signaling is  
601 required for granuloma formation, likely due to its requirement for macrophage  
602 recruitment to the lung during early stages of infection. Our model enables further  
603 exploration of the requirement of GM-CSF for granuloma maintenance. For example,  
604 future experiments can introduce GM-CSF antibodies into *mar1* $\Delta$ -infected mice to

605 determine whether GM-CSF is required for *mar1* $\Delta$ -induced granuloma maintenance and  
606 control of infection. Furthermore, WT strain infections can be supplemented with  
607 exogenous GM-CSF to determine whether increased GM-CSF can help maintain WT-  
608 induced granulomas.

609         Despite the reduced fungal burden of the *mar1* $\Delta$  mutant strain compared to the  
610 WT strain, the *mar1* $\Delta$  mutant strain persists in the murine lung long-term, up to 100 DPI.  
611 Titan cell formation is a well-characterized persistence mechanism that is specific to  
612 *Cryptococcus* species (35, 37). Results from an established *in vitro* titanization assay  
613 (30) in combination with our histopathological observations demonstrate that the *mar1* $\Delta$   
614 mutant strain is unable to form Titan cells, and as a result, Titan cells do not explain the  
615 persistence of the *mar1* $\Delta$  mutant strain in the murine lung. We also observed that the  
616 *mar1* $\Delta$  mutant strain is attenuated in the implementation of another important virulence  
617 factor, the polysaccharide capsule. Although the *mar1* $\Delta$  mutant strain has a similar  
618 basal level of capsule to the WT strain, it is unable to extend its capsule to the level of  
619 the WT strain in response to capsule-inducing signals.

620         The expression of many virulence factors is known to be mediated by the cell  
621 cycle (41). Furthermore, recent work has proposed that *C. neoformans* undergoes a  
622 unique cell cycle *in vivo*, the “stress cell cycle”, that regulates the employment of various  
623 virulence factors (55). Titan cells are polyploid cryptococcal cells that form in both  
624 human and mouse lungs during infection (35, 37). This polyploidization and concomitant  
625 cell body enlargement is negatively regulated by the transcription factor Usv101, which  
626 acts downstream of the cell cycle regulator Swi6 (30, 38). Furthermore, recent work has  
627 found that the cyclin, Cln1, contributes to Titan cell formation by regulating DNA

628 replication and cell division after G<sub>2</sub>-arrest *in vivo* (55). Similarly, capsule elongation is  
629 also regulated by the cell cycle, with the majority of capsule elongation occurring in G<sub>1</sub>  
630 phase of the cell cycle (40). The dysregulation of these cell cycle-mediated virulence  
631 factors suggests that the *mar1Δ* mutant strain harbors cell cycle defects.

632 We indeed observed that the *mar1Δ* mutant strain displays a marked increase in  
633 cytokinesis defects compared to the WT strain, at both 30°C and 37°C, leading to a  
634 decreased growth rate. In various cell types, including stem cells (56), tumor cells (57),  
635 bacteria (58), and fungi (43), a reduction in growth rate is required for survival in the  
636 presence of hypoxia. It is possible that its inherent decreased growth rate predisposes  
637 the *mar1Δ* mutant strain to growth in a hypoxic environment. The mammalian  
638 environment is known to limit oxygen availability to invading microorganisms, as a  
639 stressor used to contain microbial proliferation (42). This important resource is likely  
640 even further restricted within the pulmonary granuloma, which is known to have  
641 suboptimal oxygen levels in the context of mycobacterial infection (59). Recent work by  
642 the Alanio laboratory has demonstrated that cryptococcal dormancy can be induced by  
643 a combination of nutrient and oxygen deprivation (44, 60). Furthermore, the Dromer  
644 laboratory has found that dormant cryptococcal cells are characterized by reduced  
645 metabolic activity and delayed growth (43). With these observations in mind, it is  
646 possible that the slow growth and hypoxia resistance phenotypes of the *mar1Δ* mutant  
647 strain enable its survival and persistence within granulomas in the model described  
648 here. Further work will be required to determine whether these phenotypes are  
649 necessary and/or sufficient for fungal survival and persistence within granulomas.

650           The Del Poeta laboratory has developed the most well-characterized murine  
651 pulmonary granuloma model of cryptococcal disease to date using the *gcs1Δ* mutant  
652 strain. From the fungal perspective, the *gcs1Δ* mutant strain lacks the membrane  
653 sphingolipid glucosylceramide, making it an obligate intracellular pathogen and, as a  
654 result, completely avirulent in a murine inhalation model, the route of infection that most  
655 closely replicates the course of human infection (18, 19). It is noteworthy that both the  
656 *gcs1Δ* mutant strain and the *mar1Δ* mutant strain are constructed in the same WT strain  
657 background, and as a result, these two mutant strains are comparable and can  
658 potentially be used together to explore the complex characteristics of granuloma  
659 formation. For example, both strains display cell cycle defects in the presence of  
660 physiological stress: the *gcs1Δ* mutant strain arrests at alkaline pH (18) and the *mar1Δ*  
661 mutant strain displays cytokinesis defects at 37°C. These similarities suggest that a  
662 slow growth phenotype in the host environment may favor fungal containment with  
663 granulomas. Virulence potential is a notable difference between the strains. The *gcs1Δ*  
664 mutant strain is unable to initiate infection and disease via the inhalation route of  
665 infection (18), categorizing *GCS1* as a disease initiation factor (61). In contrast, the  
666 *mar1Δ* mutant strain can establish infection and cause fatal disease in nearly half of the  
667 infected mice (23), making *MAR1* a disease progression factor (61). This may be  
668 related to the fact that *GCS1* orthologs are found in many pathogenic fungi (18), while  
669 *MAR1* appears to be a *Cryptococcus*-specific gene (23). These contrasting features  
670 suggest that granuloma formation is a highly complex process that relies on the  
671 interplay between many fungal and host factors.

672 From the host perspective, *gcs1Δ*-induced granuloma formation requires host  
673 sphingosine kinase 1-sphingosine 1-phosphate (SK1-S1P) signaling (20, 21). Most  
674 recently, the Del Poeta laboratory has applied this model to explore cryptococcal  
675 reactivation. Mimicking human disease, *gcs1Δ* mutant cells become reactivated from  
676 granulomas and disseminate upon immunosuppression with the multiple sclerosis  
677 therapeutic FTY720, which suppresses SK1-S1P signaling (22). This model has  
678 enabled the first murine reactivation studies of cryptococcal infection. Future work with  
679 *mar1Δ*-induced granulomas can similarly explore reactivation in the context of  
680 immunosuppression, to better understand the typical course of cryptococcal disease in  
681 humans. One of the populations most vulnerable to cryptococcal reactivation includes  
682 untreated HIV/AIDS patients (7). In our leukocyte infiltrate analyses, we observed that  
683 *mar1Δ*-infected lungs have an enhanced CD4+ T cell response compared to WT-  
684 infected lungs at 21 DPI. This observation is particularly striking because *mar1Δ*-  
685 infected lungs have a decreased or equivalent response compared to WT-infected lungs  
686 for all other leukocytes tested at this same timepoint. CD4+ T cells are present in  
687 pulmonary granulomas of immunocompetent individuals (62). Furthermore, CD4+ T  
688 cells border the periphery of pulmonary granulomas in HIV+ individuals receiving  
689 antiretroviral therapy, but they are lost in individuals with advanced HIV/AIDS,  
690 suggesting that CD4+ lymphocytes may be involved in granuloma maintenance (2, 62).  
691 By inducing CD4+ T cell depletion, and as a result mimicking the HIV/AIDS disease  
692 state, we can probe the role of CD4+ T cells in the maintenance of granulomas in this  
693 model. Following immunosuppression, we can observe *mar1Δ*-infected mice to track  
694 granuloma breakdown and fungal proliferation with the same approaches used here.

695 Considering both the fungal and host drivers of granuloma formation outlined here, this  
696 model harbors features that make it unique from other existing cryptococcal granuloma  
697 models.

698

## 699 **ACKNOWLEDGEMENTS**

700 We thank the Duke University School of Medicine for the use of the Research  
701 Immunohistochemistry Laboratory Shared Resource, which prepared all histopathology  
702 samples. We thank Dr. Joseph Heitman and Anna Floyd-Averette for providing the  
703 *Csf2rb*<sup>-/-</sup> mice. Flow cytometry was performed in the Flow Cytometry and Laser  
704 Capture Microdissection Core Facility at The University of North Texas Health Science  
705 Center (UNTHSC) (which is supported by National Institutes of Health award  
706 ISIORR018999-01A1) and the Cell Analysis Core at The University of Texas at San  
707 Antonio. Scanning electron microscopy was performed at the Chapel Hill Analytical and  
708 Nanofabrication Laboratory, CHANL, a member of the North Carolina Research  
709 Triangle Nanotechnology Network, RTNN, which is supported by the National Science  
710 Foundation, Grant ECCS-1542015, as part of the National Nanotechnology Coordinated  
711 Infrastructure, NNCI. This work was supported by R01 AI074677 from the National  
712 Institutes of Health to JAA and FLW.

713

## 714 **CONFLICT OF INTEREST**

715 The authors declare there is no conflict of interest.

716

## 717 **REFERENCES**



- 718 1. Adams DO. 1976. The granulomatous inflammatory response. A review. *Am J*  
719 *Pathol* 84:164–191.
- 720 2. Shibuya K, Hirata A, Omuta J, Sugamata M, Katori S, Saito N, Murata N, Morita  
721 A, Takahashi K, Hasegawa C, Mitsuda A, Hatori T, Nonaka H. 2005. Granuloma  
722 and cryptococcosis. *J Infect Chemother* 11:115–122.
- 723 3. Ramakrishnan L. 2012. Revisiting the role of the granuloma in tuberculosis. *Nat*  
724 *Rev Immunol* 12:352–366.
- 725 4. Ristow LC, Davis JM. 2021. The granuloma in cryptococcal disease. *PLoS*  
726 *Pathog* 17:e1009342.
- 727 5. Oehlers SH, Cronan MR, Scott NR, Thomas MI, Okuda KS, Walton EM, Beerman  
728 RW, Crosier PS, Tobin DM. 2015. Interception of host angiogenic signalling limits  
729 mycobacterial growth. *Nature* 517:612–615.
- 730 6. Zumla A, James DG. 1996. Granulomatous infections: etiology and classification.  
731 *Clin Infect Dis* 23:146–158.
- 732 7. Rajasingham R, Smith RM, Park BJ, Jarvis JN, Govender NP, Chiller TM,  
733 Denning DW, Loyse A, Boulware DR. 2017. Global burden of disease of HIV-  
734 associated cryptococcal meningitis: an updated analysis. *Lancet Infect Dis*  
735 17:873–881.
- 736 8. Goldman DL, Khine H, Abadi J, Lindenberg DJ, Priofski LA, Niang R, Casadevall  
737 A. 2001. Serologic evidence for *Cryptococcus neoformans* infection in early  
738 childhood. *Pediatrics* 107:E66.
- 739 9. McDonnell JM, Hutchins GM. 1985. Pulmonary cryptococcosis. *Hum Pathol*  
740 16:121–128.

- 741 10. Warr W, Bates JH, Stone A. 1968. The spectrum of pulmonary cryptococcosis.  
742 *Ann Intern Med* 69:1109–1116.
- 743 11. Grebenciucova E, Reder AT, Bernard JT. 2016. Immunologic mechanisms of  
744 fingolimod and the role of immunosenescence in the risk of cryptococcal infection:  
745 a case report and review of literature. *Mult Scler Relat Disord* 9:158–162.
- 746 12. Normile TG, Bryan AM, Poeta MD. 2020. Animal models of *Cryptococcus*  
747 *neoformans* in identifying immune parameters associated with primary infection  
748 and reactivation of latent infection. *Front Immunol* 11:581750.
- 749 13. Perfect JR, Lang SD, Durack DT. 1980. Chronic cryptococcal meningitis: a new  
750 experimental model in rabbits. *Am J Pathol* 101:177–194.
- 751 14. Goldman D, Cho Y, Zhao M, Casadevall A, Lee SC. 1996. Expression of inducible  
752 nitric oxide synthase in rat pulmonary *Cryptococcus neoformans* granulomas. *Am*  
753 *J Pathol* 148:1275–1282.
- 754 15. Kobayashi M, Ito M, Sano K, Koyama M. 2000. Granulomatous and cytokine  
755 responses to pulmonary *Cryptococcus neoformans* in two strains of rats.  
756 *Mycopathologia* 151:121–130.
- 757 16. Feldmesser M, Casadevall A, Kress Y, Spira G, Orlofsky A. 1997. Eosinophil-  
758 *Cryptococcus neoformans* interactions *in vivo* and *in vitro*. *Infect Immun* 65:1899–  
759 1907.
- 760 17. Chen GH, Olszewski MA, Mcdonald RA, Wells JC, Paine R, Huffnagle GB, Toews  
761 GB. 2007. Role of granulocyte macrophage colony-stimulating factor in host  
762 defense against pulmonary *Cryptococcus neoformans* infection during murine  
763 allergic bronchopulmonary mycosis. *Am J Pathol* 170:1028–1040.

- 764 18. Rittershaus PC, Kechichian TB, Allegood JC, Merrill AH, Hennig M, Luberto C,  
765 Poeta MD. 2006. Glucosylceramide synthase is an essential regulator of  
766 pathogenicity of *Cryptococcus neoformans*. *J Clin Invest* 116:1651–1659.
- 767 19. Kechichian TB, Shea J, Poeta MD. 2007. Depletion of alveolar macrophages  
768 decreases the dissemination of a glucosylceramide-deficient mutant of  
769 *Cryptococcus neoformans* in immunodeficient mice. *Infect Immun* 75:4792–4798.
- 770 20. McQuiston T, Luberto C, Poeta MD. 2010. Role of host sphingosine kinase 1 in  
771 the lung response against cryptococcosis. *Infect Immun* 78:2342–2352.
- 772 21. Farnoud AM, Bryan AM, Kechichian T, Luberto C, Poeta MD. 2015. The  
773 granuloma response controlling cryptococcosis in mice depends on the  
774 sphingosine kinase 1–sphingosine 1-phosphate pathway. *Infect Immun* 83:2705–  
775 2713.
- 776 22. Bryan AM, You JK, McQuiston T, Lazzarini C, Qiu Z, Sheridan B, Nuesslein-  
777 Hildesheim B, Poeta MD. 2020. FTY720 reactivates cryptococcal granulomas in  
778 mice through S1P receptor 3 on macrophages. *J Clin Invest* 130:4546–4560.
- 779 23. Esher SK, Ost KS, Kohlbrenner MA, Pinalto KM, Telzrow CL, Campuzano A,  
780 Nichols CB, Munro C, Wormley FL, Alspaugh JA. 2018. Defects in intracellular  
781 trafficking of fungal cell wall synthases lead to aberrant host immune recognition.  
782 *PLoS Pathog* 14:e1007126.
- 783 24. Gonzalez-Juarrero M, Hattle JM, Izzo A, Junqueira-Kipnis AP, Shim TS, Trapnell  
784 BC, Cooper AM, Orme IM. 2005. Disruption of granulocyte macrophage-colony  
785 stimulating factor production in the lungs severely affects the ability of mice to  
786 control *Mycobacterium tuberculosis* infection. *J Leukoc Biol* 77:914–922.

- 787 25. Szeliga J, Daniel DS, Yang CH, Sever-Chroneos Z, Jagannath C, Chroneos ZC.  
788 2008. Granulocyte-macrophage colony stimulating factor-mediated innate  
789 responses in tuberculosis. *Tuberculosis* 88:7–20.
- 790 26. Benmerzoug S, Marinho FV, Rose S, Mackowiak C, Gosset D, Sedda D, Poisson  
791 E, Uyttenhove C, Van Snick J, Jacobs M, Garcia I, Ryffel B, Quesniaux VFJ.  
792 2018. GM-CSF targeted immunomodulation affects host response to *M.*  
793 *tuberculosis* infection. *Sci Rep* 8:8652.
- 794 27. Cox GM, Mukherjee J, Cole GT, Casadevall A, Perfect JR. 2000. Urease as a  
795 virulence factor in experimental cryptococcosis. *Infect Immun* 68:443–448.
- 796 28. Leopold Wager C, Hole CR, Wozniak KL, Olszewski MA, Mueller M, Wormley FL.  
797 2015. *STAT1* signaling within macrophages is required for antifungal activity  
798 against *Cryptococcus neoformans*. *Infect Immun* 83:4513–4527.
- 799 29. Hole CR, Leopold Wager CM, Castro-Lopez N, Campuzano A, Cai H, Wozniak  
800 KL, Wang Y, Wormley FL. 2019. Induction of memory-like dendritic cell responses  
801 *in vivo*. *Nat Commun* 10:2955.
- 802 30. Dambuza IM, Drake T, Chapuis A, Zhou X, Correia J, Taylor-Smith L, LeGrave N,  
803 Rasmussen T, Fisher MC, Bicanic T, Harrison TS, Jaspars M, May RC, Brown  
804 GD, Yucecel R, MacCallum DM, Ballou ER. 2018. The *Cryptococcus neoformans*  
805 Titan cell is an inducible and regulated morphotype underlying pathogenesis.  
806 *PLoS Pathog* 14:e1006978.
- 807 31. Brown HE, Telzrow CL, Saelens JW, Fernandes L, Alspaugh JA. 2020. Sterol-  
808 response pathways mediate alkaline survival in diverse fungi. *mBio* 11:e00719-  
809 20.

- 810 32. Al-Bader N, Vanier G, Liu H, Gravelat FN, Urb M, Hoareau CMQ, Campoli P,  
811 Chabot J, Filler SG, Sheppard DC. 2010. Role of trehalose biosynthesis in  
812 *Aspergillus fumigatus* development, stress response, and virulence. *Infect Immun*  
813 78:3007–3018.
- 814 33. Ost KS, O’Meara TR, Huda N, Esher SK, Alspaugh JA. 2015. The *Cryptococcus*  
815 *neoformans* alkaline response pathway: identification of a novel Rim pathway  
816 activator. *PLoS Genet* 11:e1005159.
- 817 34. Zacharias CA, Sheppard DC. 2019. The role of *Aspergillus fumigatus*  
818 polysaccharides in host–pathogen interactions. *Curr Opin Microbiol* 52:20–26.
- 819 35. Zaragoza O, García-Rodas R, Nosanchuk JD, Cuenca-Estrella M, Rodríguez-  
820 Tudela JL, Casadevall A. 2010. Fungal cell gigantism during mammalian  
821 infection. *PLoS Pathog* 6:e1000945.
- 822 36. McQuiston TJ, Williamson PR. 2012. Paradoxical roles of alveolar macrophages  
823 in the host response to *Cryptococcus neoformans*. *J Infect Chemother* 18:1–9.
- 824 37. Cruickshank JG, Cavill R, Jelbert M. 1973. *Cryptococcus neoformans* of unusual  
825 morphology. *Appl Microbiol* 25:309–312.
- 826 38. Hommel B, Mukaremera L, Cordero RJB, Coelho C, Desjardins CA, Sturny-  
827 Leclère A, Janbon G, Perfect JR, Fraser JA, Casadevall A, Cuomo CA, Dromer F,  
828 Nielsen K, Alanio A. 2018. Titan cells formation in *Cryptococcus neoformans* is  
829 finely tuned by environmental conditions and modulated by positive and negative  
830 genetic regulators. *PLoS Pathog* 14:e1006982.
- 831 39. Zaragoza O, Telzak A, Bryan RA, Dadachova E, Casadevall A. 2006. The  
832 polysaccharide capsule of the pathogenic fungus *Cryptococcus neoformans*

- 833 enlarges by distal growth and is rearranged during budding. *Mol Microbiol* 59:67–  
834 83.
- 835 40. García-Rodas R, Cordero RJB, Trevijano-Contador N, Janbon G, Moyrand F,  
836 Casadevall A, Zaragoza O. 2014. Capsule growth in *Cryptococcus neoformans* is  
837 coordinated with cell cycle progression. *mBio* 5:e00945-14.
- 838 41. Kelliher CM, Leman AR, Sierra CS, Haase SB. 2016. Investigating conservation  
839 of the cell-cycle-regulated transcriptional program in the fungal pathogen,  
840 *Cryptococcus neoformans*. *PLoS Genet* 12:e1006453.
- 841 42. Grahl N, Shepardson KM, Chung D, Cramer RA. 2012. Hypoxia and fungal  
842 pathogenesis: to air or not to air? *Eukaryot Cell* 11:560–570.
- 843 43. Alanio A, Vernel-Pauillac F, Sturny-Leclère A, Dromer F. 2015. *Cryptococcus*  
844 *neoformans* host adaptation: toward biological evidence of dormancy. *mBio*  
845 6:e02580-14.
- 846 44. Hommel B, Sturny-Leclère A, Volant S, Veluppillai N, Duchateau M, Yu CH,  
847 Hourdel V, Varet H, Matondo M, Perfect JR, Casadevall A, Dromer F, Alanio A.  
848 2019. *Cryptococcus neoformans* resists to drastic conditions by switching to  
849 viable but non-culturable cell phenotype. *PLoS Pathog* 15:e1007945.
- 850 45. Ohkusu M, Raclavsky V, Takeo K. 2001. Deficit in oxygen causes G<sub>2</sub> budding and  
851 unbudded G<sub>2</sub> arrest in *Cryptococcus neoformans*. *FEMS Microbiol Lett* 204:29–  
852 32.
- 853 46. Ohkusu M, Raclavsky V, Takeo K. 2004. Induced synchrony in *Cryptococcus*  
854 *neoformans* after release from G<sub>2</sub>-arrest. *Antonie Van Leeuwenhoek* 85:37–44.
- 855 47. Arora S, Hernandez Y, Erb-Downward JR, McDonald RA, Toews GB, Huffnagle

- 856 GB. 2005. Role of IFN-gamma in regulating T<sub>2</sub> immunity and the development of  
857 alternatively activated macrophages during allergic bronchopulmonary mycosis. *J*  
858 *Immunol* 174:6346–6356.
- 859 48. Hardison SE, Ravi S, Wozniak KL, Young ML, Olszewski MA, Wormley FL. 2010.  
860 Pulmonary infection with an interferon-gamma-producing *Cryptococcus*  
861 *neoformans* strain results in classical macrophage activation and protection. *Am J*  
862 *Pathol* 176:774–785.
- 863 49. Leopold Wager CM, Wormley FL. 2014. Classical versus alternative macrophage  
864 activation: the Ying and the Yang in host defense against pulmonary fungal  
865 infections. *Mucosal Immunol* 7:1023–1035.
- 866 50. Walachowski S, Tabouret G, Fabre M, Foucras G. 2017. Molecular analysis of a  
867 short-term model of β-glucans-trained immunity highlights the accessory  
868 contribution of GM-CSF in priming mouse macrophages response. *Front Immunol*  
869 8:1089.
- 870 51. Williment JA, Lin HH, Reid DM, Taylor PR, Williams DL, Wong SYC, Gordon S,  
871 Brown GD. 2003. Dectin-1 expression and function are enhanced on alternatively  
872 activated and GM-CSF-treated macrophages and are negatively regulated by IL-  
873 10, dexamethasone, and lipopolysaccharide. *J Immunol* 171:4569–4573.
- 874 52. Rosen LB, Freeman AF, Yang LM, Jutivorakool K, Olivier KN, Angkasekwinai N,  
875 Suputtamongkol Y, Bennett JE, Pyrgos V, Williamson PR, Ding L, Holland SM,  
876 Browne SK. 2013. Anti-GM-CSF autoantibodies in patients with cryptococcal  
877 meningitis. *J Immunol* 190:3959–3966.
- 878 53. Saijo T, Chen J, Chen SCA, Rosen LB, Yi J, Sorrell TC, Bennett JE, Holland SM,

- 879 Browne SK, Kwon-Chung KJ. 2014. Anti-granulocyte-macrophage colony-  
880 stimulating factor autoantibodies are a risk factor for central nervous system  
881 infection by *Cryptococcus gattii* in otherwise immunocompetent patients. *mBio*  
882 5:e00912-14.
- 883 54. Viola GM, Malek AE, Rosen LB, DiNardo AR, Nishiguchi T, Okhuysen PC,  
884 Holland SM, Kontoyiannis DP. 2021. Disseminated cryptococcosis and anti-  
885 granulocyte-macrophage colony-stimulating factor autoantibodies: an  
886 underappreciated association. *Mycoses* 64:576–582.
- 887 55. Altamirano S, Li Z, Fu MS, Ding M, Fulton SR, Yoder JM, Tran V, Nielsen K.  
888 2021. The cyclin Cln1 controls polyploid Titan cell formation following a stress-  
889 induced G<sub>2</sub> arrest in *Cryptococcus*. *mBio* 12:e0250921.
- 890 56. Latil M, Rocheteau P, Châtre L, Sanulli S, Mémet S, Ricchetti M, Tajbakhsh S,  
891 Chrétien F. 2012. Skeletal muscle stem cells adopt a dormant cell state post  
892 mortem and retain regenerative capacity. *Nat Commun* 3:903.
- 893 57. Kinoshita M, Johnson DL, Shatney CH, Lee YL, Mochizuki H. 2001. Cancer cells  
894 surviving hypoxia obtain hypoxia resistance and maintain anti-apoptotic potential  
895 under reoxygenation. *Int J Cancer* 91:322–326.
- 896 58. Bagchi G, Das TK, Tyagi JS. Molecular analysis of the dormancy response in  
897 *Mycobacterium smegmatis*: expression analysis of genes encoding the DevR-  
898 DevS two-component system, Rv3134c and chaperone alpha-crystallin  
899 homologues. *FEMS Microbiol Lett* 211:231–237.
- 900 59. Qualls JE, Murray PJ. 2016. Immunometabolism within the tuberculosis  
901 granuloma: amino acids, hypoxia, and cellular respiration. *Semin Immunopathol*



- 902 38:139–152.
- 903 60. Alanio A. 2020. Dormancy in *Cryptococcus neoformans*: 60 years of accumulating  
904 evidence. *J Clin Invest* 130:3353–3360.
- 905 61. Cramer RA, Kowalski CH. 2021. Is it time to kill the survival curve? A case for  
906 disease progression factors in microbial pathogenesis and host defense research.  
907 *mBio* 12:e03483-20.
- 908 62. Shibuya K, Coulson WF, Naoe S. 2002. Histopathology of deep-seated fungal  
909 infections and detailed examination of granulomatous response against  
910 cryptococci in patients with acquired immunodeficiency syndrome. *Nihon Ishinkin*  
911 *Gakkai Zasshi* 43:143–151.
- 912 63. O’Meara TR, Holmer SM, Selvig K, Dietrich F, Alspaugh JA. 2013. *Cryptococcus*  
913 *neoformans* Rim101 Is associated with cell wall remodeling and evasion of the  
914 host immune responses. *mBio* 4:e00522-12.

915

## 916 **FIGURE LEGENDS**

### 917 **Figure 1. Pulmonary granuloma formation in murine cryptococcal infections. A.**

918 Lung dissections of female C57BL/6 mice infected with the *mar1Δ* mutant strain were  
919 performed to display macroscopic lung pathology, specifically granulomas (white  
920 arrowheads). Cartoon adapted from BioRender.com (2021). B. The lungs of female  
921 C57BL/6 mice inoculated with  $1 \times 10^4$  cells of the WT strain or the *mar1Δ* mutant strain  
922 sacrificed at predetermined endpoints (3, 7, 14, and 40 DPI) were harvested for  
923 histopathological analyses. Hematoxylin and eosin staining were utilized to visualize  
924 microscopic lung pathology (fungal cells [yellow arrowheads], multinucleated giant cells

925 [yellow circle], epithelioid macrophages (yellow arrows), inset [yellow boxes]). 5x scale  
926 bar (left), 250  $\mu\text{m}$ . 10x scale bar (right), 50  $\mu\text{m}$ . C. Granuloma diameter ( $\mu\text{m}$ ) was  
927 measured using FIJI.  $\sigma$ , standard deviation ( $\mu\text{m}$ ). Gray box, no experimental subjects  
928 can be assessed at this timepoint.

929

930 **Figure 2. Fungal burden throughout infection.** Pulmonary fungal burden of female  
931 C57BL/6 mice ( $n = 15$ ) inoculated with  $1 \times 10^4$  cells of the WT strain or the *mar1* $\Delta$   
932 mutant strain was measured by quantitative cultures throughout infection: 3, 7, 14, and  
933 21 DPI. Brain fungal burden of female C57BL/6 mice ( $n = 15$ ) inoculated with  $1 \times 10^4$   
934 cells of the WT strain or the *mar1* $\Delta$  mutant strain was measured by quantitative cultures  
935 at 21 DPI. Error bars represent standard error of the mean (SEM). Statistical  
936 significance was determined using Student's *t* test (\*\*\*,  $P < 0.001$ ; \*\*\*\*,  $P < 0.0001$ ; ns,  
937 not significant).

938

939 **Figure 3. Pulmonary cytokine profile and leukocyte infiltrate associated with**  
940 **granuloma formation.** A. Pulmonary cytokine responses of female C57BL/6 mice  
941 inoculated with  $1 \times 10^4$  cells of the WT strain or the *mar1* $\Delta$  mutant strain were measured  
942 using the Bio-Plex protein array system throughout infection: 1 ( $n = 15$ ), 3 ( $n = 15$ ), 7 ( $n$   
943 = 10), 14 ( $n = 10$ ), and 21 ( $n = 10$ ) DPI. Error bars represent SEM. Statistical  
944 significance between strains at each timepoint was determined using Student's *t* test (\*,  
945  $P < 0.05$ ; \*\*,  $P < 0.01$ ; \*\*\*,  $P < 0.001$ ; \*\*\*\*,  $P < 0.0001$ ; no designation between strains,  
946 not significant). Only a subset of data is shown; refer to Figure S2 for full analysis. B.  
947 Pulmonary leukocyte infiltrates of female C57BL/6 mice inoculated with  $1 \times 10^4$  cells of

948 the WT strain or the *mar1* $\Delta$  mutant strain were measured by flow cytometry throughout  
949 infection: 1, 3, 7, and 21 DPI. Data shown are the mean  $\pm$  of absolute cell numbers from  
950 three independent experiments ( $n = 3$ ) performed using five mice per group per  
951 timepoint per experiment. Error bars represent SEM. Statistical significance between  
952 strains at each timepoint was determined using Student's *t* test (\*,  $P < 0.05$ ; no  
953 designation between strains, not significant). Only a subset of data is shown; refer to  
954 Figure S3 for full analysis. C. Pulmonary macrophage activation of female C57BL/6  
955 mice ( $n = 3$ ) inoculated with  $1 \times 10^4$  cells of the WT strain or the *mar1* $\Delta$  mutant strain  
956 were measured by flow cytometry throughout infection: 7, 14, and 21 DPI. Inducible  
957 nitrogen oxide synthase (iNOS) was used as a marker for M1 macrophages and  
958 Arginase 1 (Arg1) was used as a marker for M2 macrophages. The percentage of total  
959 iNOS+ cells and Arg1+ cells is shown. Error bars represent the SEM. Log  
960 transformation was used to normally distribute the data for statistical analysis. Statistical  
961 significance between strains at each timepoint was determined using Student's *t* test (\*,  
962  $P < 0.05$ ; no designation between strains, not significant). AM = alveolar macrophage  
963 (CD45+, CD11b-). IM = interstitial macrophage (CD45+, CD11b+). Cartoons adapted  
964 from BioRender.com (2021).

965

966 **Figure 4. Contributions of GM-CSF signaling to pulmonary granuloma formation.**

967 A. The lungs of female ( $n = 2$ ) (shown) and male ( $n = 2$ ) (not shown) *Csf2rb*<sup>-/-</sup> mice  
968 inoculated with  $1 \times 10^4$  cells of the WT strain or the *mar1* $\Delta$  mutant strain sacrificed at  
969 predetermined endpoints (3, 7, and 14 DPI) were harvested for histopathological  
970 analyses. Hematoxylin and eosin staining were utilized to visualize microscopic lung

971 pathology (fungal cells [yellow arrowheads], inset [yellow boxes]). 5x scale bar (left),  
972 250  $\mu\text{m}$ . 10x scale bar (right), 50  $\mu\text{m}$ . B. Pulmonary fungal burden of female ( $n = 2$ ) and  
973 male ( $n = 2$ ) *Csf2rb*<sup>-/-</sup> mice inoculated with  $1 \times 10^4$  cells of the WT strain or the *mar1* $\Delta$   
974 mutant strain sacrificed at 3 DPI was measured by quantitative cultures. Error bars  
975 represent the SEM. Statistical significance was determined using Student's *t* test (\*,  $P <$   
976 0.05).

977

978 **Figure 5. Cell cycle-mediated virulence factor phenotypes of the *mar1* $\Delta$  mutant**

979 **strain.** A. Titan cell formation was induced in the WT strain, the *mar1* $\Delta$  mutant strain,  
980 and the *mar1* $\Delta$  + *MAR1* complemented strain. Cells were pre-grown in YNB medium at  
981 30°C and an OD<sub>600</sub> of 0.001 was transferred to 10% HI-FBS in PBS incubated at 5%  
982 CO<sub>2</sub>, 37°C for 96 hours. Cells were imaged by DIC microscopy (Zeiss Axio Imager A1).  
983 Cell diameter was measured using FIJI, and cells with a diameter > 10  $\mu\text{m}$  were  
984 considered Titan cells (red arrowheads). The number of Titan cells per 10,000 cells was  
985 calculated for each strain. A minimum of 400 cells were analyzed across three biological  
986 replicates ( $n = 3$ ). Error bars represent the SEM. Statistical significance was determined  
987 using a one-way ANOVA (\*,  $P < 0.05$ ; ns, not significant). 63x scale bar, 10  $\mu\text{m}$ . B. The  
988 WT strain, the *mar1* $\Delta$  mutant strain, the *mar1* $\Delta$  + *MAR1* complemented strain, and the  
989 *cap59* $\Delta$  mutant strain were incubated in YPD medium at 30°C and CO<sub>2</sub>-independent  
990 medium (TC) at 37°C until saturation. Samples were subsequently fixed, mounted,  
991 dehydrated, and sputter-coated. Samples were imaged with a Hitachi S-4700 scanning  
992 electron microscope to visualize capsule organization and elaboration.

993

994 **Figure 6. Slow growth phenotypes of the *mar1Δ* mutant strain.** A. Morphological  
995 defects were analyzed in the WT strain, the *mar1Δ* mutant strain, and the *mar1Δ* +  
996 *MAR1* complemented strain through incubation in YPD medium at either 30°C or 37°C.  
997 Cells were imaged by DIC microscopy (Zeiss Axio Imager A1) and were subsequently  
998 visually inspected for morphological defects, such as elongated cells (red squares),  
999 wide bud necks (red arrowhead), and cytokinesis failure (red circle). The percentage of  
1000 total cells displaying morphological defects was quantified for each strain at each  
1001 temperature. A minimum of 500 cells were analyzed across three biological replicates  
1002 ( $n=3$ ). Error bars represent the SEM. Log transformation was used to normally  
1003 distribute the data for statistical analysis (two-way ANOVA; \*,  $P < 0.05$ ; \*\*,  $P < 0.01$ ; ns,  
1004 not significant). 63x scale bar, 10  $\mu\text{m}$ . B. Growth of the WT strain, the *mar1Δ* mutant  
1005 strain, and the *mar1Δ* + *MAR1* complemented strain was assessed in YPD medium at  
1006 37°C. Growth was tracked for 40 hours and was measured by absorbance at OD<sub>600</sub>.  
1007 Figure summarizes data across three biological replicates ( $n=3$ ). Error bars represent  
1008 the SEM. C. Hypoxia resistance was assessed by growth on YES medium in the  
1009 presence of CoCl<sub>2</sub> (0.7 mM) and in a microaerophilic chamber. Serial dilutions of the WT  
1010 strain, the *mar1Δ* mutant strain, the *mar1Δ* + *MAR1* complemented strain, and the *sre1Δ*  
1011 mutant strain were spotted onto agar plates and incubated at 30°C. Results were  
1012 compared to the same strains grown in ambient air conditions.

1013

1014 **Table 1. Fungal strains used in this study.**

| Strain | Genotype               | Source |
|--------|------------------------|--------|
| H99    | <i>MATα</i>            | (13)   |
| MAK1   | <i>MATα mar1Δ::NAT</i> | (23)   |

|       |                                                                       |      |
|-------|-----------------------------------------------------------------------|------|
| MAK11 | <i>MAT<math>\alpha</math> mar1<math>\Delta</math>::NAT + MAR1-NEO</i> | (23) |
| cap59 | <i>MAT<math>\alpha</math> cap59<math>\Delta</math>::NEO</i>           | (63) |
| HEB6  | <i>MAT<math>\alpha</math> sre1<math>\Delta</math>::NEO</i>            | (31) |

1015

1016 **Figure S1. Additional histopathology granuloma images.** A. Medium power image  
1017 from a WT-infected C57BL/6 mouse at 7 DPI, demonstrating a moderate peribronchiolar  
1018 neutrophilic and mononuclear inflammatory reaction with vague, early, and poorly  
1019 formed granulomata formation (10X). B. Low power image from a *mar1 $\Delta$* -infected  
1020 C57BL/6 mouse at 3 DPI, demonstrating an absence of a significant inflammatory  
1021 reaction (4X). C, D. Low power image (C) from a *mar1 $\Delta$* -infected C57BL/6 mouse at 40  
1022 DPI showing a relatively well-circumscribed nodule containing well developed  
1023 organizing lymphohistiocytic inflammation and medium power view (D) highlighting  
1024 compact histiocytic aggregates and peripheral mononuclear cells, characteristic of  
1025 granuloma formation (C; 4X, D; 10X). E. Medium power image from a WT-infected  
1026 *Csf2rb<sup>-/-</sup>* mouse at 7 DPI showing a marked peribronchiolar neutrophilic and  
1027 mononuclear inflammatory reaction without granuloma formation (10X). F. Low power  
1028 image from a WT-infected *Csf2rb<sup>-/-</sup>* mouse at 14 DPI demonstrating an absence of a  
1029 significant inflammatory reaction (4X). All images are of hematoxylin- and eosin-stained  
1030 tissue sections.

1031

1032 **Figure S2. Complete pulmonary cytokine profile throughout infection.** Pulmonary  
1033 cytokine responses of female C57BL/6 mice inoculated with  $1 \times 10^4$  cells of the WT  
1034 strain or the *mar1 $\Delta$*  mutant strain were measured using the Bio-Plex protein array  
1035 system throughout infection: 1 ( $n = 15$ ), 3 ( $n = 15$ ), 7 ( $n = 10$ ), 14 ( $n = 10$ ), and 21 ( $n =$

1036 10) DPI. Error bars represent SEM. Statistical significance between strains at each  
1037 timepoint was determined using Student's *t* test (\*,  $P < 0.05$ ; \*\*,  $P < 0.01$ ; \*\*\*,  $P < 0.001$ ;  
1038 \*\*\*\*,  $P < 0.0001$ ; no designation between strains, not significant).

1039

1040 **Figure S3. Complete pulmonary leukocyte infiltrate response throughout**

1041 **infection.** Pulmonary immune cell infiltrates of female C57BL/6 mice inoculated with  $1 \times$   
1042  $10^4$  cells of the WT strain or the *mar1* $\Delta$  mutant strain were measured by flow cytometry  
1043 throughout infection: 1, 3, 7, 14, and 21 DPI. Data shown are the mean  $\pm$  of absolute  
1044 cell numbers from three independent experiments ( $n = 3$ ) performed using five mice per  
1045 group per timepoint per experiment. Error bars represent the SEM. Statistical  
1046 significance between strains at each timepoint was determined using Student's *t* test (\*,  
1047  $P < 0.05$ ; \*\*,  $P < 0.01$ ; no designation between strains, not significant).

1048

1049 **Figure S4. Recovery of *mar1* $\Delta$  mutant cells from murine lungs at extended**

1050 **timepoints in infection.** Lungs from female C57BL/6 mice infected with the *mar1* $\Delta$   
1051 mutant strain were harvested at 61 and 100 DPI. Single fungal colonies were isolated  
1052 on YPD agar plates and subsequently incubated in various conditions that allowed for  
1053 identification of *mar1* $\Delta$  mutant isolates: YPD medium at 30°C, YPD medium at 37°C,  
1054 YPD medium + nourseothricin (NAT), and YPD medium pH 8.15. The original WT strain  
1055 (A1) and *mar1* $\Delta$  mutant strain (A2) are included as controls in each condition.

1056

1057 **Figure S5. Granuloma formation and maintenance timeline.** Chronological summary  
1058 of important observations about granuloma formation and maintenance in the WT strain

1059 (top) and *mar1* $\Delta$  mutant strain (bottom) backgrounds. Cartoons adapted from

1060 BioRender.com (2021).



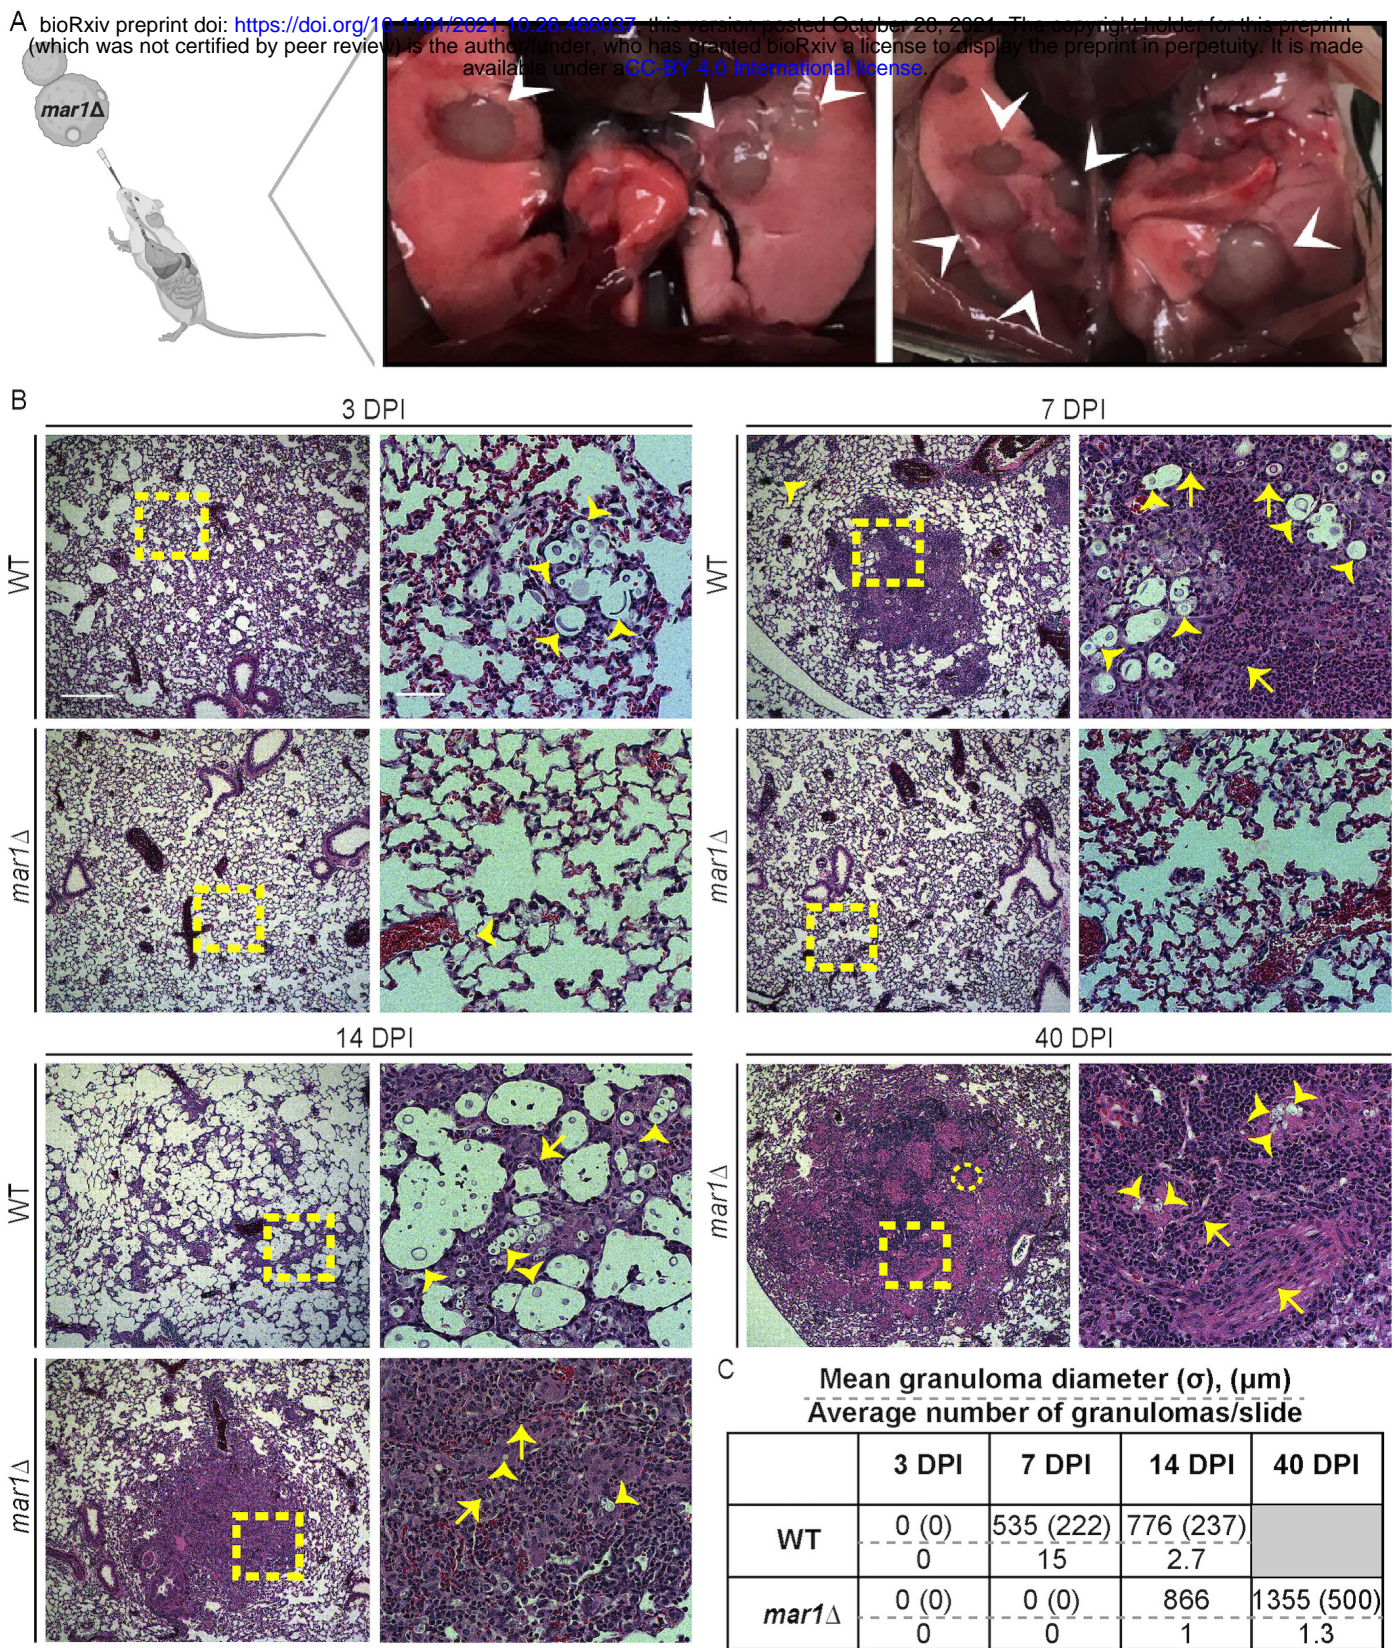

**Figure 1. Pulmonary granuloma formation in murine cryptococcal infections.** A. Lung dissections of female C57BL/6 mice infected with the *mar1Δ* mutant strain were performed to display macroscopic lung pathology, specifically granulomas (white arrowheads). Cartoon adapted from BioRender.com (2021). B. The lungs of female C57BL/6 mice inoculated with  $1 \times 10^4$  cells of the WT strain or the *mar1Δ* mutant strain sacrificed at predetermined endpoints (3, 7, 14, and 40 DPI) were harvested for histopathological analyses. Hematoxylin and eosin staining were utilized to visualize microscopic lung pathology (fungal cells [yellow arrowheads], multinucleated giant cells [yellow circle], epithelioid macrophages (yellow arrows), inset [yellow boxes]). 5x scale bar (left), 250  $\mu\text{m}$ . 10x scale bar (right), 50  $\mu\text{m}$ . C. Granuloma diameter ( $\mu\text{m}$ ) was measured using FIJI.  $\sigma$ , standard deviation ( $\mu\text{m}$ ). Gray box, no experimental subjects can be assessed at this timepoint.

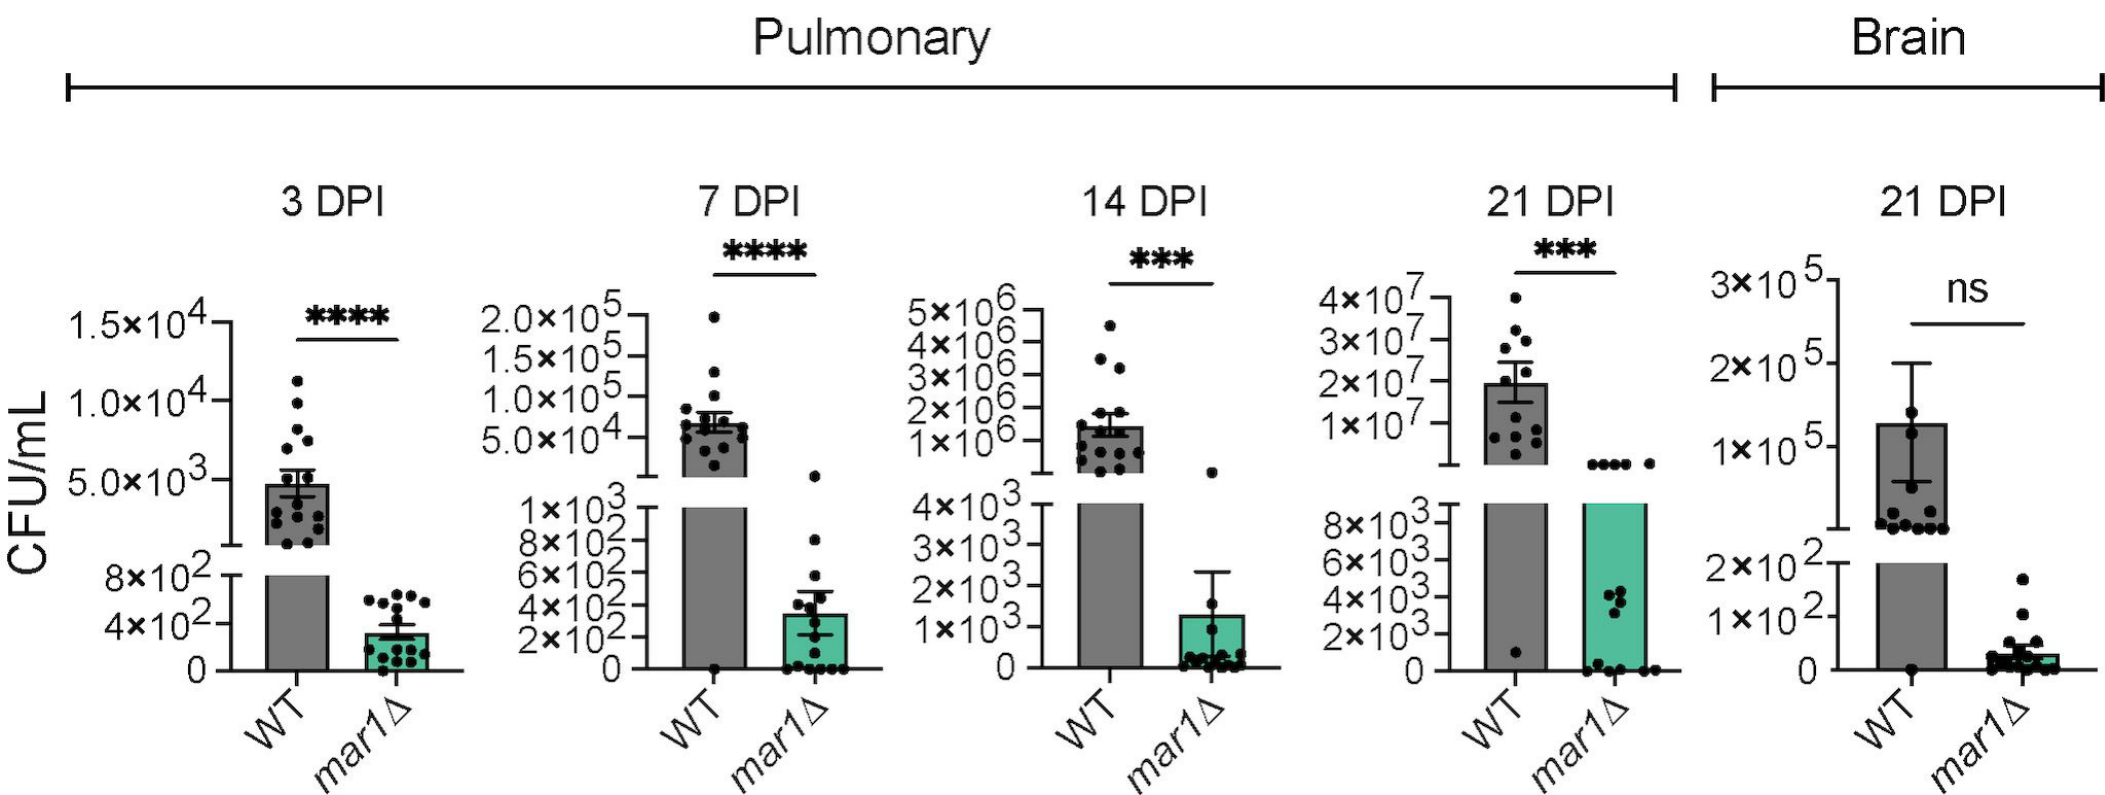

**Figure 2. Fungal burden throughout infection.** Pulmonary fungal burden of female C57BL/6 mice ( $n = 15$ ) inoculated with  $1 \times 10^4$  cells of the WT strain or the *mar1Δ* mutant strain was measured by quantitative cultures throughout infection: 3, 7, 14, and 21 DPI. Brain fungal burden of female C57BL/6 mice ( $n = 15$ ) inoculated with  $1 \times 10^4$  cells of the WT strain or the *mar1Δ* mutant strain was measured by quantitative cultures at 21 DPI. Error bars represent standard error of the mean (SEM). Statistical significance was determined using Student's *t* test (\*\*\*,  $P < 0.001$ ; \*\*\*\*,  $P < 0.0001$ ; ns, not significant).

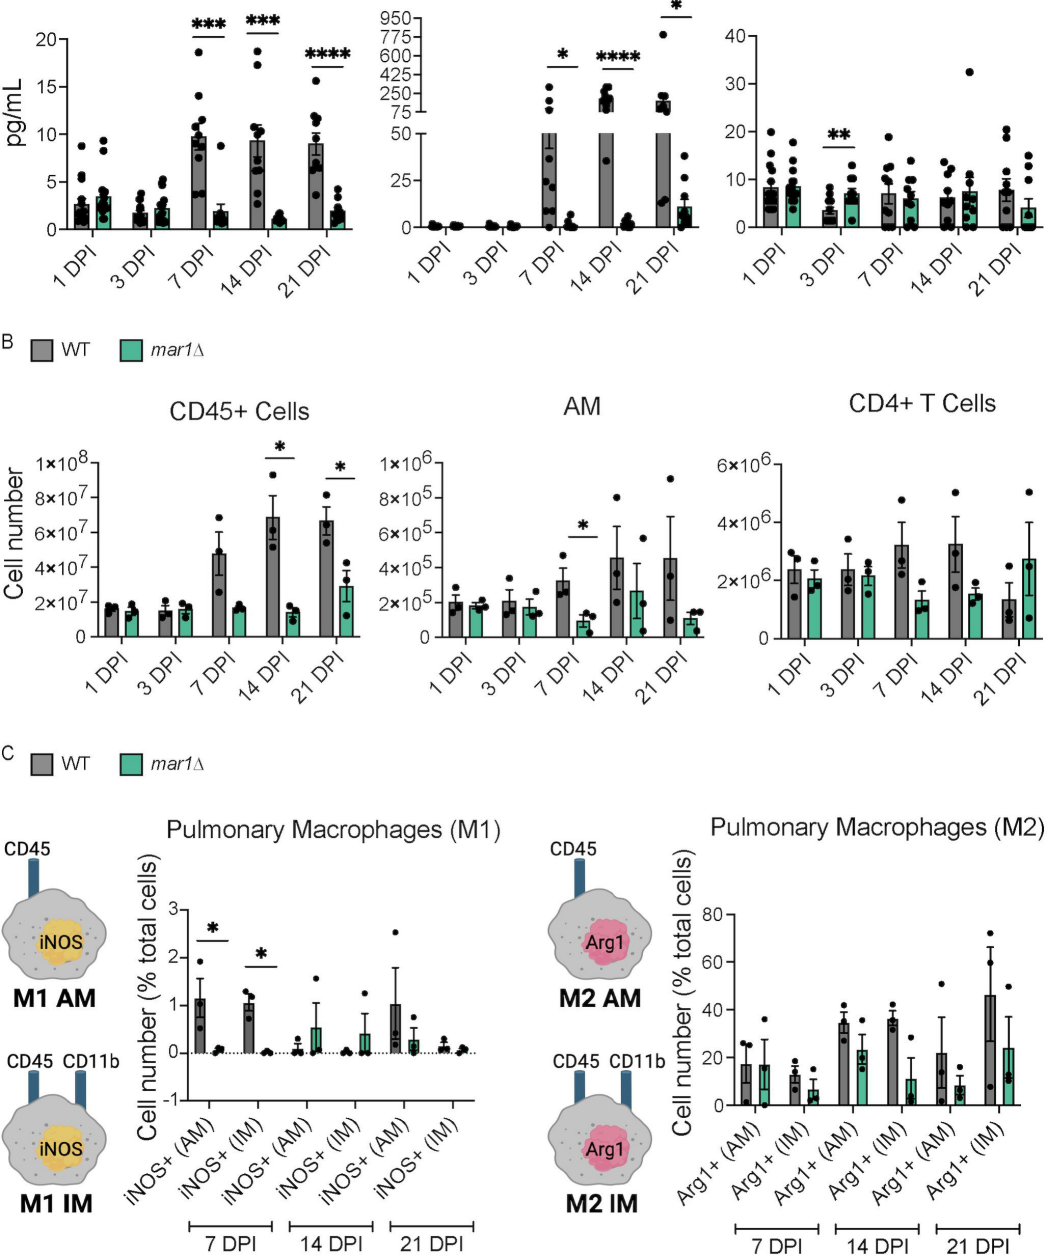

**Figure 3. Pulmonary cytokine profile and leukocyte infiltrate associated with granuloma formation.**

**A.** Pulmonary cytokine responses of female C57BL/6 mice inoculated with  $1 \times 10^4$  cells of the WT strain or the *mar1 $\Delta$  mutant strain were measured using the Bio-Plex protein array system throughout infection: 1 ( $n = 15$ ), 3 ( $n = 15$ ), 7 ( $n = 10$ ), 14 ( $n = 10$ ), and 21 ( $n = 10$ ) DPI. Error bars represent SEM. Statistical significance between strains at each timepoint was determined using Student's *t* test (\*,  $P < 0.05$ ; \*\*,  $P < 0.01$ ; \*\*\*,  $P < 0.001$ ; \*\*\*\*,  $P < 0.0001$ ; no designation between strains, not significant). Only a subset of data is shown; refer to Figure S2 for full analysis.*

**B.** Pulmonary leukocyte infiltrates of female C57BL/6 mice inoculated with  $1 \times 10^4$  cells of the WT strain or the *mar1 $\Delta$  mutant strain were measured by flow cytometry throughout infection: 1, 3, 7, and 21 DPI. Data shown are the mean  $\pm$  of absolute cell numbers from three independent experiments ( $n = 3$ ) performed using five mice per group per timepoint per experiment. Error bars represent SEM. Statistical significance between strains at each timepoint was determined using Student's *t* test (\*,  $P < 0.05$ ; no designation between strains, not significant). Only a subset of data is shown; refer to Figure S3 for full analysis.*

**C.** Pulmonary macrophage activation of female C57BL/6 mice ( $n = 3$ ) inoculated with  $1 \times 10^4$  cells of the WT strain or the *mar1 $\Delta$  mutant strain were measured by flow cytometry throughout infection: 7, 14, and 21 DPI. Inducible nitrogen oxide synthase (iNOS) was used as a marker for M1 macrophages and Arginase 1 (Arg1) was used as a marker for M2 macrophages. The percentage of total iNOS+ cells and Arg1+ cells is shown. Error bars represent the SEM. Log transformation was used to normally distribute the data for statistical analysis. Statistical significance between strains at each timepoint was determined using Student's *t* test (\*,  $P < 0.05$ ; no designation between strains, not significant). AM = alveolar macrophage (CD45+, CD11b-). IM = interstitial macrophage (CD45+, CD11b+). Cartoons adapted from BioRender.com (2021).*

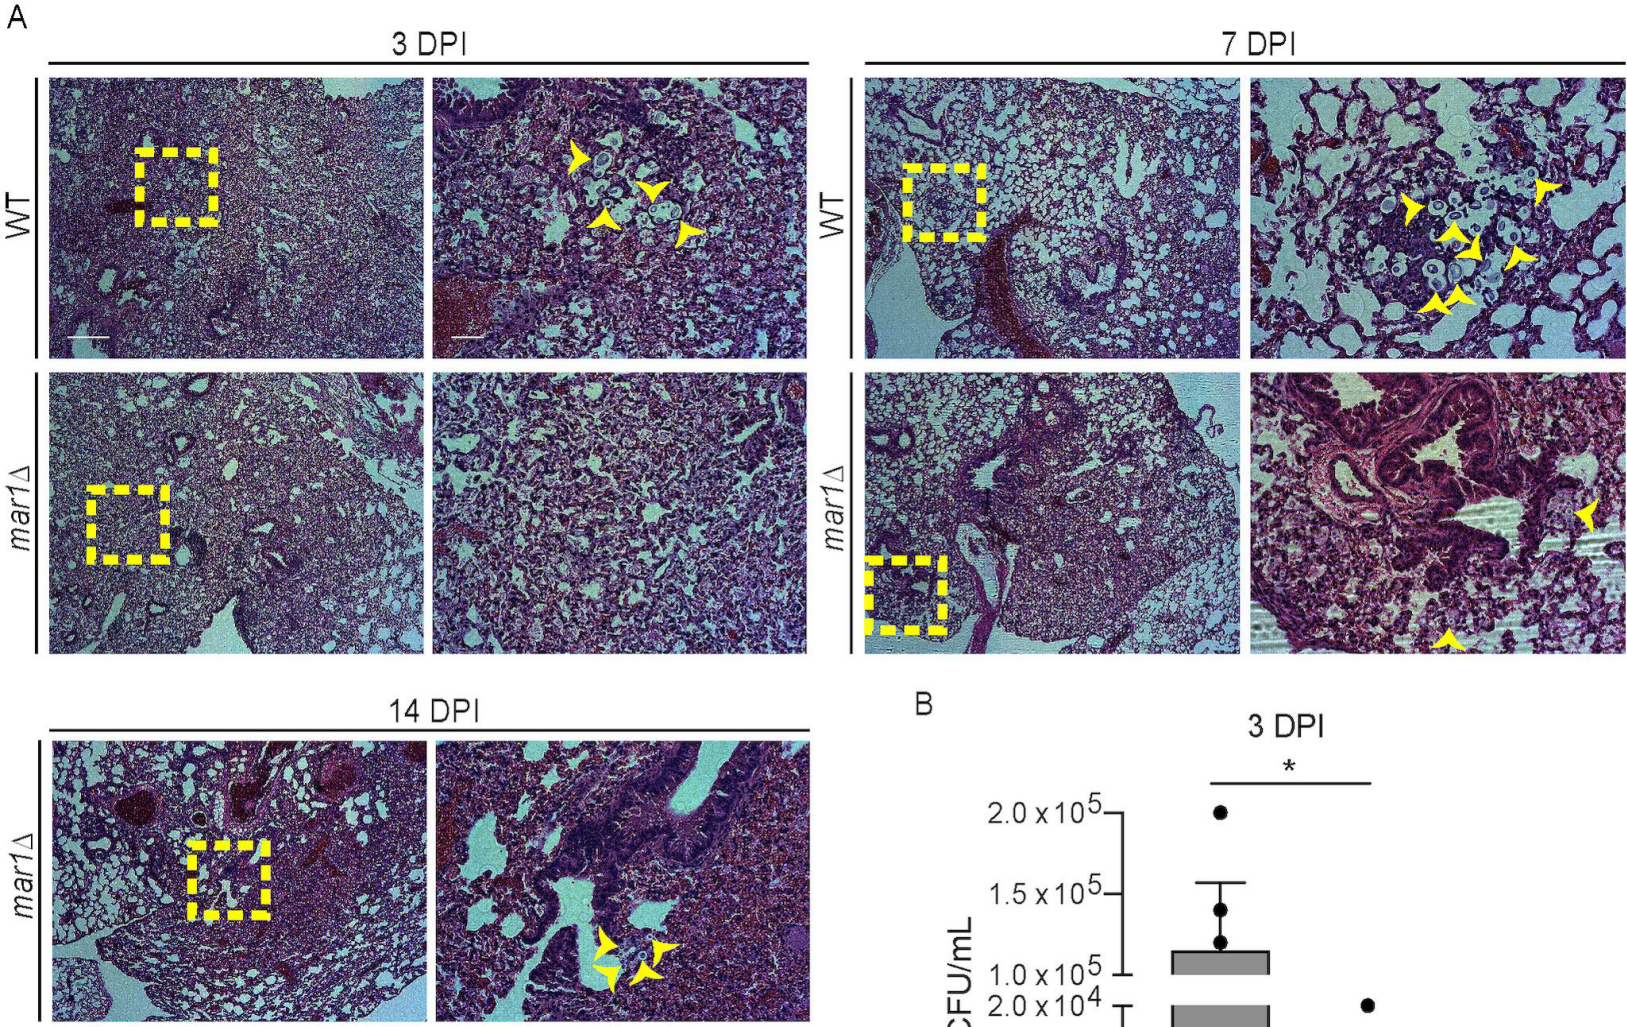

**Figure 4. Contributions of GM-CSF signaling to pulmonary granuloma formation.**

A. The lungs of female ( $n = 2$ ) (shown) and male ( $n = 2$ ) (not shown) *Csf2rb*<sup>-/-</sup> mice inoculated with  $1 \times 10^4$  cells of the WT strain or the *mar1* $\Delta$  mutant strain sacrificed at predetermined endpoints (3, 7, and 14 DPI) were harvested for histopathological analyses. Hematoxylin and eosin staining were utilized to visualize microscopic lung pathology (fungal cells [yellow arrowheads], inset [yellow boxes]). 5x scale bar (left), 250  $\mu$ m. 10x scale bar (right), 50  $\mu$ m. B. Pulmonary fungal burden of female ( $n = 2$ ) and male ( $n = 2$ ) *Csf2rb*<sup>-/-</sup> mice inoculated with  $1 \times 10^4$  cells of the WT strain or the *mar1* $\Delta$  mutant strain sacrificed at 3 DPI was measured by quantitative cultures. Error bars represent the SEM. Statistical significance was determined using Student's *t* test (\*,  $P < 0.05$ ).

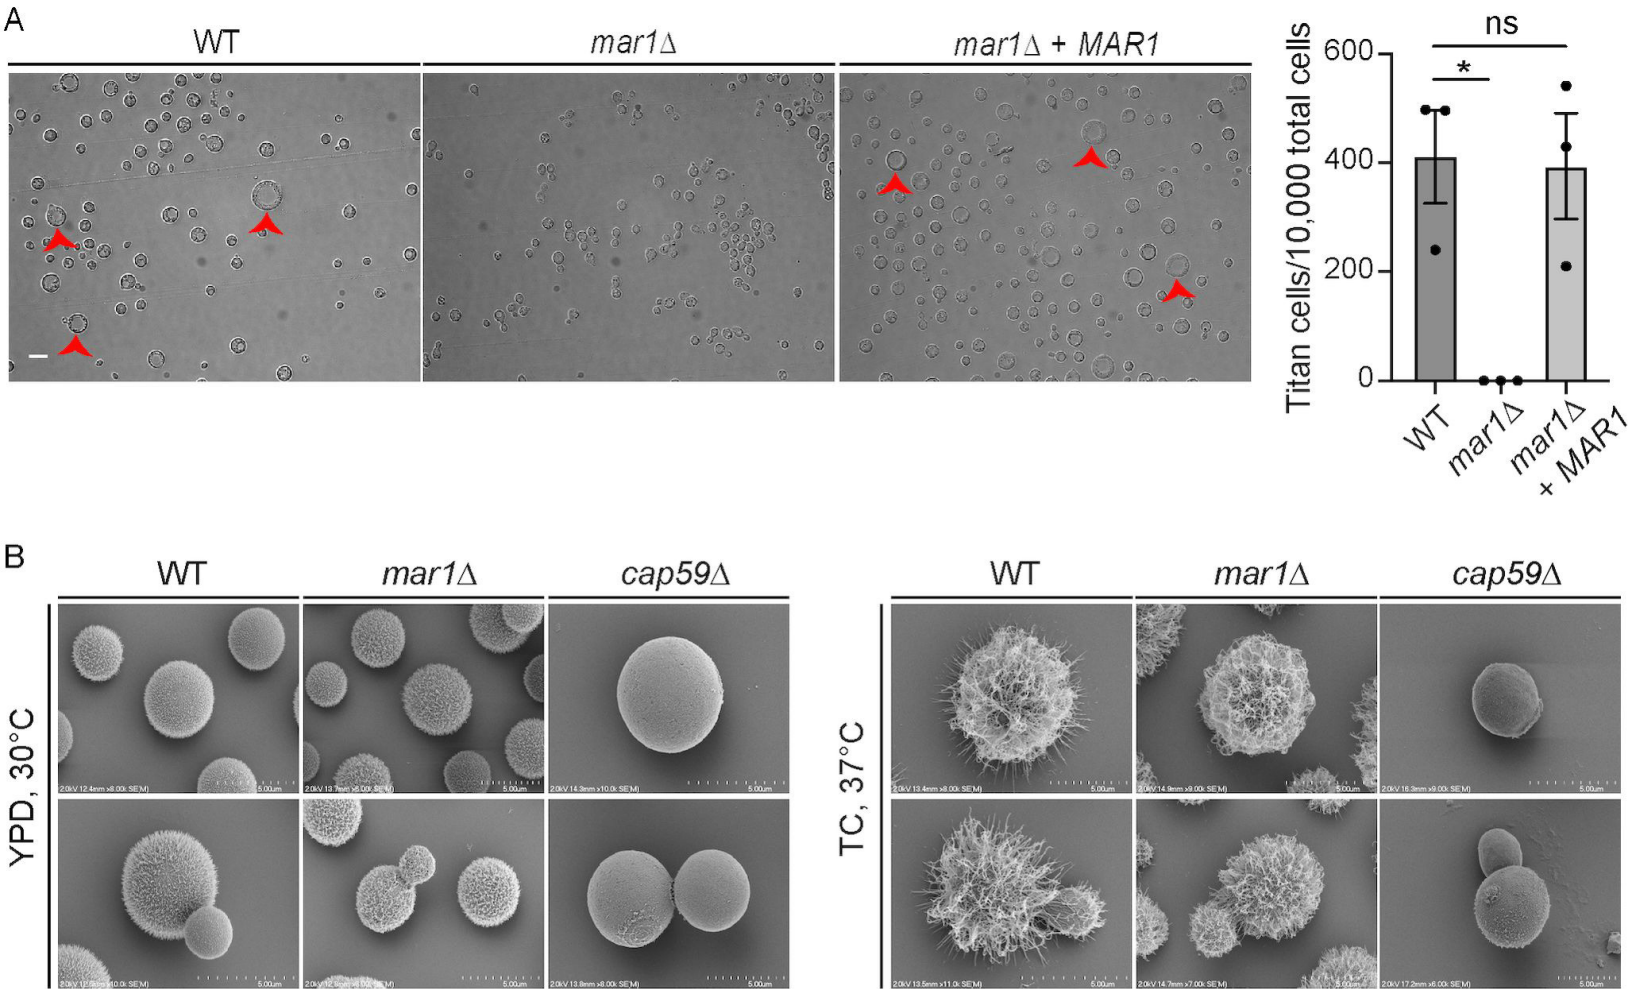

**Figure 5. Cell cycle-mediated virulence factor phenotypes of the *mar1* $\Delta$  mutant strain.**

A. Titan cell formation was induced in the WT strain, the *mar1* $\Delta$  mutant strain, and the *mar1* $\Delta$  + *MAR1* complemented strain. Cells were pre-grown in YNB medium at 30°C and an OD<sub>600</sub> of 0.001 was transferred to 10% HI-FBS in PBS incubated at 5% CO<sub>2</sub>, 37°C for 96 hours. Cells were imaged by DIC microscopy (Zeiss Axio Imager A1). Cell diameter was measured using FIJI, and cells with a diameter > 10  $\mu$ m were considered Titan cells (red arrowheads). The number of Titan cells per 10,000 cells was calculated for each strain. A minimum of 400 cells were analyzed across three biological replicates ( $n = 3$ ). Error bars represent the SEM. Statistical significance was determined using a one-way ANOVA (\*,  $P < 0.05$ ; ns, not significant). 63x scale bar, 10  $\mu$ m. B. The WT strain, the *mar1* $\Delta$  mutant strain, the *mar1* $\Delta$  + *MAR1* complemented strain, and the *cap59* $\Delta$  mutant strain were incubated in YPD medium at 30°C and CO<sub>2</sub>-independent medium (TC) at 37°C until saturation. Samples were subsequently fixed, mounted, dehydrated, and sputter-coated. Samples were imaged with a Hitachi S-4700 scanning electron microscope to visualize capsule organization and elaboration.

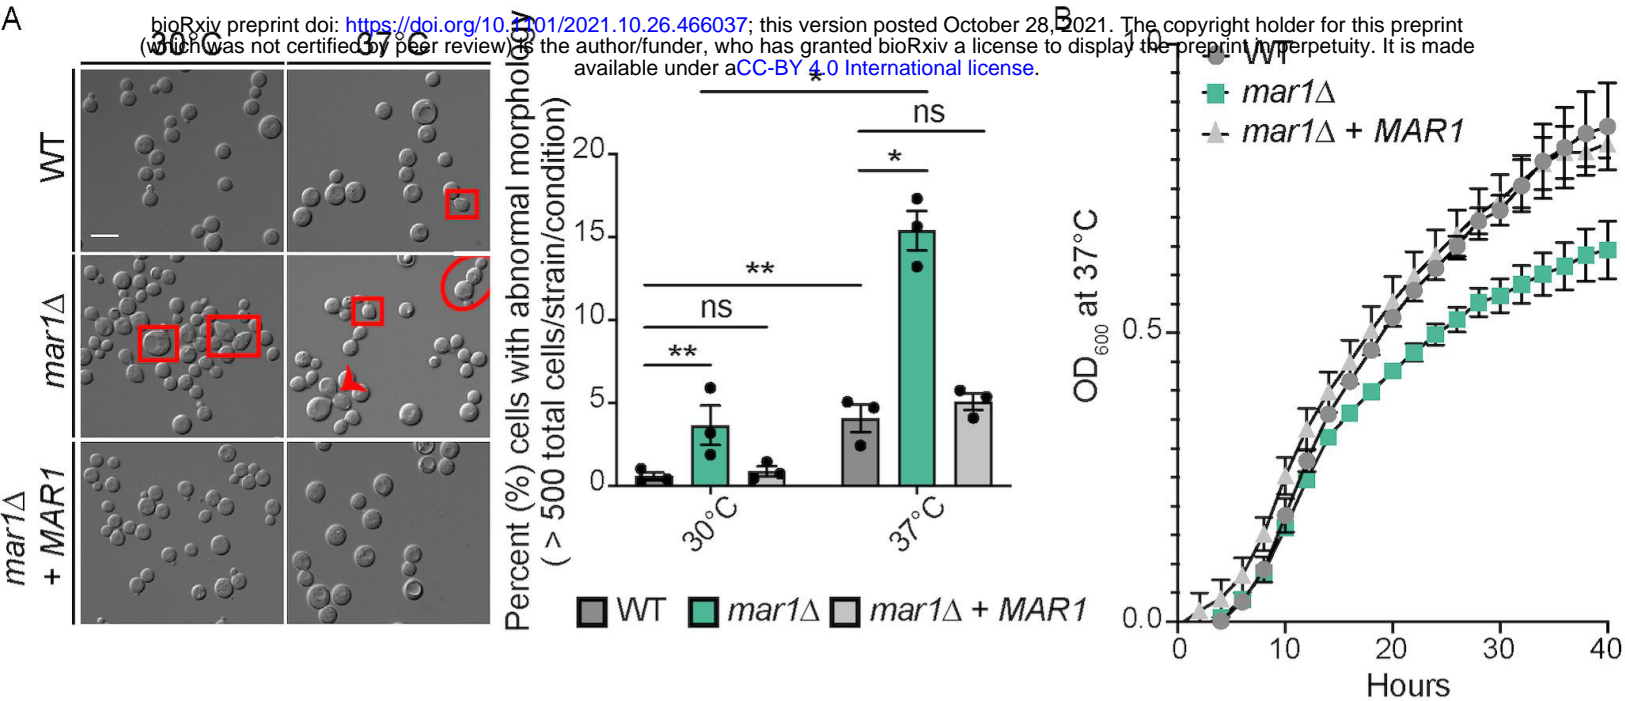

**Figure 6. Slow growth phenotypes of the *mar1Δ* mutant strain.** A. Morphological defects were analyzed in the WT strain, the *mar1Δ* mutant strain, and the *mar1Δ + MAR1* complemented strain through incubation in YPD medium at either 30°C or 37°C. Cells were imaged by DIC microscopy (Zeiss Axio Imager A1) and were subsequently visually inspected for morphological defects, such as elongated cells (red squares), wide bud necks (red arrowhead), and cytokinesis failure (red circle). The percentage of total cells displaying morphological defects was quantified for each strain at each temperature. A minimum of 500 cells were analyzed across three biological replicates ( $n = 3$ ). Error bars represent the SEM. Log transformation was used to normally distribute the data for statistical analysis (two-way ANOVA; \*,  $P < 0.05$ ; \*\*,  $P < 0.01$ ; ns, not significant). 63x scale bar, 10  $\mu\text{m}$ . B. Growth of the WT strain, the *mar1Δ* mutant strain, and the *mar1Δ + MAR1* complemented strain was assessed in YPD medium at 37°C. Growth was tracked for 40 hours and was measured by absorbance at OD<sub>600</sub>. Figure summarizes data across three biological replicates ( $n = 3$ ). Error bars represent the SEM. C. Hypoxia resistance was assessed by growth on YES medium in the presence of CoCl<sub>2</sub> (0.7 mM) and in a microaerophilic chamber. Serial dilutions of the WT strain, the *mar1Δ* mutant strain, the *mar1Δ + MAR1* complemented strain, and the *sre1Δ* mutant strain were spotted onto agar plates and incubated at 30°C. Results were compared to the same strains grown in ambient air conditions.
